# Supplementary material for: Comprehensive analysis of the Spartina alterniflora WD40 gene family reveals the regulatory role of SaTTG1 in plant development
Source: Front Plant Sci. 2024 May 28;15:1390461. doi: 10.3389/fpls.2024.1390461 (PMC11165199; doi:10.3389/fpls.2024.1390461)
Supplement: Supplementary file 2 [file Table_1.xlsx]

## Sheet: Table S1
Table S1. Primers used in this study
Primer name	Primer sequence	Purpose
SaTTG1-BD-PF	GAGGAGGACCTGCATATGGACCATCCGAAGGTGCC	Y2H
SaTTG1-BD-PR	ACGGATCCCCGGGAATTCTCAGAACATGGTATCTAAACC
SaTTG1-XbaI-GFP-PF	gggTCTAGAATGGACCATCCGAAGGTGCC	GFP
SaTTG1-KpnI-GFP-PR	gggGGTACCTCAGAACATGGTATCTAAACC
AtEF1αA4-PF	CTGGAGGTTTTGAGGCTGGTA	qRT-PCR
AtEF1αA4-PR	CCAAGGGTGAAAGCAAGAAGA
SaTTG1-DL-PF	TGCAGAGATAAACCAGCTGC
SaTTG1-DL-PR	TCAGAACATGGTATCTAAACC
SaGAPDH-PF	ACTGGTATGTCTTTCCGTGTCC
SaGAPDH-PR	ATCCTCATCAGTGTAGCCCAT

## Sheet: Table S2
Table S2. Physical and Chemical Properties of Spartina alterniflora WD40 genes
Gene number	SaWD40 gene ID	Gene-length	Number of exon	CDS-length	Number of WD40 repeats	Number of Amino Acid	Molecular Weight
SaWD40-44	SA_02G040800	1935	1	1611	7	536	58122.9
SaWD40-111	SA_05G011400	1492	1	1266	6	421	45614.8
SaWD40-136	SA_05G319000	3044	1	1035	7	344	38292.4
SaWD40-156	SA_06G259000	3016	1	1035	7	344	38247.3
SaWD40-237	SA_09G005400	1515	1	1221	5	406	42544.6
SaWD40-252	SA_09G345300	3384	1	1239	4	412	44203.8
SaWD40-263	SA_10G003900	1227	1	1227	5	408	42966.2
SaWD40-274	SA_10G219800	3690	1	1239	5	412	43767.4
SaWD40-301	SA_11G134300	1885	1	1236	4	411	43925.5
SaWD40-316	SA_12G040500	9318	1	1059	6	352	37936
SaWD40-336	SA_12G336700	1206	1	1056	3	351	37733.4
SaWD40-355	SA_13G146500	797	1	675	3	224	24229.5
SaWD40-377	SA_14G149400	921	1	921	6	306	33460.7
SaWD40-388	SA_14G274500	3050	1	1668	5	555	61499
SaWD40-431	SA_17G142500	1659	1	921	6	306	33519.8
SaWD40-487	SA_23G073400	3660	1	471	1	156	17283.6
SaWD40-508	SA_25G053600	7975	1	906	5	301	32503.7
SaWD40-520	SA_26G049400	2502	1	906	5	301	32307.4
SaWD40-547	SA_28G155600	2287	1	1449	5	482	52866.1
SaWD40-560	SA_29G092600	1672	1	1368	5	455	46830.6
SaWD40-573	SA_30G103900	1516	1	1374	5	457	47290.3
SaWD40-6	SA_01G036600	2046	2	1521	7	506	54712.1
SaWD40-17	SA_01G244400	2591	2	993	7	330	35971.5
SaWD40-19	SA_01G296700	2332	2	1947	2	648	70059.8
SaWD40-20	SA_01G296800	3681	2	3240	3	1079	118988
SaWD40-27	SA_01G332300	4118	2	960	7	319	34340.6
SaWD40-29	SA_01G339000	1896	2	1452	6	483	52217.6
SaWD40-49	SA_02G141700	3067	2	1731	6	576	64285.2
SaWD40-55	SA_02G244500	1912	2	993	7	330	35872.4
SaWD40-61	SA_02G333100	4358	2	960	7	319	34380.7
SaWD40-63	SA_02G340200	5770	2	1785	5	594	63554.9
SaWD40-74	SA_03G027300	1077	2	363	1	120	13494.6
SaWD40-141	SA_06G014100	4421	2	753	5	250	27699.3
SaWD40-173	SA_07G049200	1710	2	1401	5	466	49813.6
SaWD40-176	SA_07G056300	6563	2	960	7	319	34128.5
SaWD40-190	SA_07G203700	4180	2	2460	7	819	91932.7
SaWD40-192	SA_07G213500	1506	2	1455	5	484	52361.3
SaWD40-200	SA_07G275600	2129	2	1050	3	349	37897.2
SaWD40-212	SA_08G056400	6007	2	960	7	319	34155.6
SaWD40-223	SA_08G177300	3708	2	969	3	322	33981.6
SaWD40-226	SA_08G197000	3412	2	1704	7	567	63379.2
SaWD40-256	SA_09G411400	1170	2	1077	6	358	38511.4
SaWD40-296	SA_11G071700	6787	2	3825	6	1274	142976
SaWD40-308	SA_11G271600	6813	2	1182	6	393	43254.8
SaWD40-326	SA_12G116900	1430	2	1272	4	423	45496.9
SaWD40-327	SA_12G134200	3445	2	1593	4	530	57269.3
SaWD40-337	SA_12G378300	4990	2	846	6	281	30910.9
SaWD40-341	SA_13G000300	1207	2	1113	4	370	41136.5
SaWD40-345	SA_13G051300	1178	2	534	2	177	18813.3
SaWD40-346	SA_13G051400	1181	2	537	2	178	18821.3
SaWD40-368	SA_14G060700	4468	2	1617	7	538	56366.4
SaWD40-375	SA_14G136200	1207	2	1182	4	393	40511
SaWD40-392	SA_15G029900	1113	2	438	2	145	16645.8
SaWD40-432	SA_17G169100	1971	2	1557	5	518	55157
SaWD40-443	SA_18G173700	1345	2	1251	4	416	43902.7
SaWD40-445	SA_19G033500	1764	2	993	7	330	35934.4
SaWD40-451	SA_20G022800	1820	2	993	7	330	35890.4
SaWD40-467	SA_21G160700	7519	2	1710	7	569	61412.6
SaWD40-476	SA_22G113200	1892	2	1788	7	595	64711.3
SaWD40-480	SA_22G160800	4297	2	1713	7	570	61256.7
SaWD40-512	SA_25G177300	5703	2	990	6	329	35560.4
SaWD40-528	SA_27G164800	2904	2	1383	3	460	47699.9
SaWD40-529	SA_27G178400	7702	2	1035	6	344	38345.2
SaWD40-533	SA_27G229600	2732	2	1926	7	641	70555.2
SaWD40-577	SA_31G010800	4494	2	969	5	322	33970.5
SaWD40-11	SA_01G141000	2644	3	1683	7	560	62602.4
SaWD40-25	SA_01G326200	5034	3	3639	14	1212	135615
SaWD40-26	SA_01G326600	4783	3	3651	13	1216	136173
SaWD40-60	SA_02G327300	5173	3	3654	13	1217	136328
SaWD40-94	SA_04G048700	2165	3	963	4	320	35181.1
SaWD40-118	SA_05G134300	1971	3	906	6	301	32240.1
SaWD40-168	SA_07G041100	740	3	270	1	89	9416.22
SaWD40-170	SA_07G047100	727	3	309	2	102	10787
SaWD40-177	SA_07G062500	4866	3	3651	13	1216	136204
SaWD40-178	SA_07G062600	4888	3	3654	13	1217	136201
SaWD40-213	SA_08G062000	5056	3	3654	13	1217	136361
SaWD40-253	SA_09G365000	1996	3	375	1	124	12806.1
SaWD40-269	SA_10G153100	1288	3	615	2	204	21961.7
SaWD40-280	SA_10G289300	4280	3	2133	6	710	77076.3
SaWD40-354	SA_13G131600	2215	3	1362	4	453	47496.1
SaWD40-376	SA_14G144500	725	3	504	2	167	18527
SaWD40-408	SA_16G071100	2496	3	432	1	143	16381.7
SaWD40-465	SA_21G118500	2795	3	1125	5	374	38964.4
SaWD40-567	SA_30G030700	6333	3	1950	6	649	71498.4
SaWD40-68	SA_02G396000	2664	4	1518	6	505	55465.9
SaWD40-76	SA_03G047300	3962	4	1221	4	406	45139.6
SaWD40-90	SA_03G352100	3295	4	1272	2	423	45788.7
SaWD40-92	SA_04G001800	4724	4	1254	6	417	46159.6
SaWD40-107	SA_04G290500	4218	4	1305	3	434	47361.2
SaWD40-109	SA_05G005700	724	4	441	2	146	16405.7
SaWD40-112	SA_05G016600	3760	4	1308	3	435	47431.5
SaWD40-138	SA_05G342200	2767	4	1074	4	357	39882.5
SaWD40-142	SA_06G019000	4778	4	1395	2	464	50537.7
SaWD40-248	SA_09G317300	5093	4	1617	6	538	60079.6
SaWD40-276	SA_10G248100	456	4	213	1	70	7439.47
SaWD40-292	SA_11G043700	9726	4	2355	6	784	85495.7
SaWD40-304	SA_11G167500	8713	4	1608	6	535	60106
SaWD40-342	SA_13G011700	2538	4	1254	5	417	44554.7
SaWD40-347	SA_13G056800	880	4	315	1	104	11243.7
SaWD40-391	SA_15G029800	1049	4	489	3	162	18326
SaWD40-398	SA_15G182400	2304	4	585	3	194	20857.5
SaWD40-403	SA_15G268000	6623	4	1794	7	597	66523.5
SaWD40-418	SA_16G175500	5380	4	1791	7	596	66664.9
SaWD40-440	SA_18G102500	7559	4	645	4	214	23949
SaWD40-455	SA_20G105700	3793	4	654	5	217	24292.3
SaWD40-463	SA_21G109800	5079	4	1605	7	534	57275.8
SaWD40-478	SA_22G121400	2392	4	924	5	307	32048.4
SaWD40-488	SA_23G080500	2652	4	1380	5	459	50575.2
SaWD40-492	SA_23G123100	5688	4	1791	7	596	66484.4
SaWD40-499	SA_24G131500	2769	4	1383	7	460	50704.3
SaWD40-503	SA_24G193300	7622	4	1788	7	595	66454.4
SaWD40-515	SA_25G209300	594	4	333	1	110	12232.5
SaWD40-541	SA_28G061100	2144	4	1410	4	469	53445.6
SaWD40-542	SA_28G089200	4094	4	1599	5	532	55272.7
SaWD40-561	SA_29G105000	25970	4	1314	4	437	47828.8
SaWD40-575	SA_30G184900	7313	4	1347	7	448	49116.7
SaWD40-37	SA_01G396100	1620	5	447	2	148	15898.2
SaWD40-45	SA_02G045300	3306	5	1530	7	509	56557.6
SaWD40-84	SA_03G201300	2818	5	615	2	204	22350.7
SaWD40-202	SA_07G313000	6353	5	1704	7	567	62010.1
SaWD40-216	SA_08G083800	10669	5	1275	5	424	47562.4
SaWD40-228	SA_08G209900	3510	5	1530	7	509	56447.5
SaWD40-229	SA_08G223300	4238	5	1713	7	570	62218.3
SaWD40-233	SA_08G286800	4172	5	1440	7	479	53390.9
SaWD40-240	SA_09G087600	3223	5	1473	6	490	54075.6
SaWD40-254	SA_09G365200	1640	5	609	5	202	21791.5
SaWD40-267	SA_10G097000	3252	5	1656	4	551	60304.7
SaWD40-295	SA_11G063600	2849	5	1410	6	469	51383.6
SaWD40-307	SA_11G229600	2711	5	1329	5	442	48326.4
SaWD40-317	SA_12G049100	2777	5	1410	6	469	51322.5
SaWD40-332	SA_12G194800	8932	5	3495	5	1164	126819
SaWD40-358	SA_13G199400	10637	5	1182	5	393	43081
SaWD40-365	SA_13G276100	2887	5	1458	6	485	54354.2
SaWD40-380	SA_14G202000	8014	5	1224	5	407	44432.6
SaWD40-389	SA_14G277700	4051	5	1557	7	518	57546.8
SaWD40-500	SA_24G173400	8633	5	525	2	174	19228.8
SaWD40-514	SA_25G207900	5511	5	1752	2	583	63165.7
SaWD40-524	SA_26G224800	1167	5	303	1	100	11464.3
SaWD40-538	SA_27G269500	11551	5	1392	5	463	50471.2
SaWD40-555	SA_29G041200	2944	5	1266	5	421	46737.9
SaWD40-568	SA_30G041600	2745	5	1422	6	473	52114.8
SaWD40-7	SA_01G040200	6643	6	1251	6	416	46372.7
SaWD40-21	SA_01G301100	6220	6	1299	6	432	48726.4
SaWD40-23	SA_01G310500	9820	6	1143	7	380	41578.8
SaWD40-31	SA_01G342300	2608	6	1623	7	540	59419.4
SaWD40-36	SA_01G396000	1889	6	840	3	279	29538.6
SaWD40-56	SA_02G301000	5438	6	1299	6	432	48714.3
SaWD40-58	SA_02G311500	6455	6	1143	7	380	41564.6
SaWD40-85	SA_03G232300	9909	6	957	3	318	35334.8
SaWD40-128	SA_05G254700	4837	6	1833	11	610	66389.1
SaWD40-163	SA_06G323600	5113	6	1833	11	610	66180.8
SaWD40-164	SA_06G345400	4214	6	1233	5	410	45745.5
SaWD40-180	SA_07G075400	6816	6	1143	7	380	41513.4
SaWD40-182	SA_07G083100	3833	6	1278	6	425	47633.4
SaWD40-193	SA_07G217100	2390	6	822	4	273	30941.5
SaWD40-215	SA_08G076000	11341	6	1143	7	380	41559.5
SaWD40-220	SA_08G123500	3205	6	2748	6	915	99557.4
SaWD40-246	SA_09G217200	860	6	360	1	119	13776.8
SaWD40-277	SA_10G248200	1925	6	1203	5	400	43738.3
SaWD40-281	SA_10G297800	2136	6	1299	5	432	47567.2
SaWD40-400	SA_15G239800	9609	6	708	4	235	25448.1
SaWD40-428	SA_17G096500	7634	6	942	3	313	34437.1
SaWD40-2	SA_01G003500	3767	7	2322	6	773	84665.7
SaWD40-12	SA_01G167800	23021	7	717	3	238	25529.4
SaWD40-14	SA_01G187400	4274	7	981	5	326	36289.8
SaWD40-15	SA_01G227100	4246	7	2637	10	878	97030.5
SaWD40-16	SA_01G237600	11615	7	3303	7	1100	120787
SaWD40-22	SA_01G301500	7012	7	1512	7	503	55871
SaWD40-40	SA_02G005400	3893	7	2220	6	739	81557.3
SaWD40-51	SA_02G185600	3827	7	981	7	326	36291.8
SaWD40-52	SA_02G192900	4164	7	2463	6	820	88307
SaWD40-54	SA_02G236600	6324	7	3297	7	1098	120919
SaWD40-57	SA_02G301500	6008	7	1512	7	503	55800
SaWD40-64	SA_02G342200	4303	7	1458	6	485	52628.7
SaWD40-88	SA_03G252600	4907	7	2388	7	795	87774.3
SaWD40-103	SA_04G203900	14704	7	534	2	177	19825.7
SaWD40-105	SA_04G251800	6473	7	2388	7	795	87918.6
SaWD40-108	SA_04G323900	2426	7	963	5	320	36116.6
SaWD40-116	SA_05G117700	6566	7	2313	7	770	85419.7
SaWD40-133	SA_05G303600	9983	7	1026	5	341	37122.4
SaWD40-145	SA_06G117700	6395	7	2271	7	756	83827
SaWD40-158	SA_06G274600	6170	7	1023	5	340	36853.2
SaWD40-181	SA_07G082500	7288	7	1518	7	505	56281.3
SaWD40-194	SA_07G217900	4984	7	1494	6	497	54680.6
SaWD40-198	SA_07G269300	3244	7	2250	7	749	82939.5
SaWD40-232	SA_08G267100	4257	7	2256	7	751	83408.1
SaWD40-257	SA_09G418000	8363	7	1281	6	426	47284.9
SaWD40-258	SA_09G428400	4138	7	1005	5	334	37689.4
SaWD40-272	SA_10G207100	2971	7	531	1	176	19985.7
SaWD40-298	SA_11G089100	5345	7	2382	6	793	87164.9
SaWD40-310	SA_11G281900	6187	7	1023	5	340	37266.8
SaWD40-313	SA_12G021600	4922	7	2343	6	780	85904.4
SaWD40-323	SA_12G097000	2286	7	612	2	203	21860.9
SaWD40-328	SA_12G141300	2907	7	1836	6	611	68386.8
SaWD40-334	SA_12G242100	11806	7	1131	2	376	42564.5
SaWD40-339	SA_12G389900	12085	7	924	5	307	33759.9
SaWD40-360	SA_13G227500	5977	7	1023	5	340	37089.6
SaWD40-364	SA_13G273500	7499	7	2502	5	833	91389.4
SaWD40-383	SA_14G228500	10184	7	1023	5	340	37189.6
SaWD40-426	SA_17G081900	6668	7	2676	7	891	99542.3
SaWD40-441	SA_18G121400	13670	7	750	3	249	27950
SaWD40-446	SA_19G039300	4283	7	2634	11	877	97091.5
SaWD40-450	SA_20G011700	6765	7	3339	7	1112	121864
SaWD40-452	SA_20G034800	4335	7	2634	10	877	97034.4
SaWD40-530	SA_27G189900	4907	7	2331	7	776	85720.5
SaWD40-539	SA_28G028700	3951	7	2079	7	692	76397.8
SaWD40-545	SA_28G130600	3070	7	1962	6	653	71423.1
SaWD40-551	SA_28G182700	3366	7	2277	6	758	83253
SaWD40-552	SA_29G005900	4145	7	2361	5	786	85058.4
SaWD40-559	SA_29G067600	4457	7	2343	7	780	85544.1
SaWD40-563	SA_29G114000	3720	7	1971	6	656	73528.2
SaWD40-565	SA_30G008100	4187	7	2298	6	765	82879.1
SaWD40-580	SA_31G131400	3126	7	2535	5	844	91660.6
SaWD40-78	SA_03G064600	7462	8	1464	5	487	53295.8
SaWD40-83	SA_03G190600	11072	8	1062	6	353	38175.3
SaWD40-96	SA_04G078300	9493	8	1407	5	468	51487.1
SaWD40-99	SA_04G152000	3472	8	1215	5	404	44674.1
SaWD40-102	SA_04G192800	5071	8	972	6	323	35166.5
SaWD40-147	SA_06G134200	9110	8	1413	4	470	52007.1
SaWD40-183	SA_07G097300	3413	8	2568	7	855	91169.4
SaWD40-186	SA_07G113700	5042	8	945	3	314	35066
SaWD40-241	SA_09G130000	3493	8	2586	5	861	92009.4
SaWD40-251	SA_09G342000	4348	8	1587	4	528	59591.1
SaWD40-299	SA_11G127200	3276	8	915	7	304	33528.6
SaWD40-300	SA_11G128900	4382	8	2292	7	763	85335.4
SaWD40-302	SA_11G138300	4899	8	1605	4	534	60434.9
SaWD40-305	SA_11G167700	3729	8	1890	6	629	69226.5
SaWD40-320	SA_12G070600	8437	8	1698	6	565	60247.4
SaWD40-329	SA_12G142900	3258	8	915	7	304	33326.3
SaWD40-333	SA_12G194900	4687	8	1875	6	624	68765.1
SaWD40-415	SA_16G153600	10072	8	1359	6	452	49072.4
SaWD40-424	SA_17G066800	6974	8	2292	5	763	82961.2
SaWD40-444	SA_19G008700	8378	8	3768	6	1255	137504
SaWD40-468	SA_21G181000	4195	8	1365	4	454	51313.6
SaWD40-472	SA_22G048200	13511	8	1233	5	410	44782.7
SaWD40-525	SA_27G075800	2157	8	1515	4	504	55589.6
SaWD40-535	SA_27G251800	3185	8	987	5	328	34904.2
SaWD40-540	SA_28G033200	5293	8	1278	4	425	46274.4
SaWD40-543	SA_28G110400	8519	8	2505	7	834	91905.5
SaWD40-557	SA_29G053700	3678	8	2148	7	715	78681.3
SaWD40-570	SA_30G055400	3183	8	2148	7	715	78428.1
SaWD40-572	SA_30G073400	4741	8	2319	7	772	84965.5
SaWD40-574	SA_30G130200	3106	8	2022	5	673	75321.4
SaWD40-18	SA_01G247500	2657	9	963	6	320	35362.8
SaWD40-33	SA_01G349200	3901	9	966	5	321	35345.7
SaWD40-34	SA_01G370000	2665	9	723	2	240	26333.9
SaWD40-66	SA_02G389700	4435	9	969	5	322	35055.3
SaWD40-73	SA_03G027200	9578	9	5385	3	1794	199317
SaWD40-113	SA_05G050800	2772	9	1359	8	452	50391.5
SaWD40-160	SA_06G287200	20900	9	1926	6	641	70223.9
SaWD40-171	SA_07G047200	1907	9	708	4	235	26131.1
SaWD40-175	SA_07G051700	8529	9	2100	5	699	77147.2
SaWD40-189	SA_07G193400	11272	9	1035	5	344	37711.2
SaWD40-224	SA_08G189200	13510	9	1038	5	345	37767.3
SaWD40-225	SA_08G189300	11835	9	1032	5	343	37684.2
SaWD40-245	SA_09G216100	3114	9	654	2	217	23700
SaWD40-282	SA_10G308600	5712	9	1332	5	443	50407.8
SaWD40-294	SA_11G052700	5001	9	1410	4	469	52991.7
SaWD40-297	SA_11G073500	4803	9	1296	6	431	46466.7
SaWD40-315	SA_12G038700	5454	9	1296	6	431	46734
SaWD40-318	SA_12G060600	4851	9	1341	5	446	50588
SaWD40-343	SA_13G037900	6175	9	1380	4	459	51542.2
SaWD40-367	SA_14G032400	6048	9	1374	3	457	51331.9
SaWD40-393	SA_15G069400	6206	9	1275	3	424	47776.1
SaWD40-407	SA_16G024400	4312	9	1317	5	438	49806.7
SaWD40-409	SA_16G092200	5422	9	1305	5	434	48280.8
SaWD40-423	SA_17G023500	5677	9	1380	4	459	51563.1
SaWD40-435	SA_18G022800	6190	9	1380	4	459	51571
SaWD40-449	SA_19G242200	4142	9	1410	7	469	52911
SaWD40-453	SA_20G085200	7904	9	1392	7	463	52210.2
SaWD40-459	SA_21G044400	20581	9	1167	4	388	42289
SaWD40-481	SA_22G180200	4926	9	1278	4	425	47721.3
SaWD40-486	SA_23G060500	4034	9	1335	4	444	50298.1
SaWD40-491	SA_23G122700	5981	9	1050	2	349	38625.7
SaWD40-526	SA_27G083700	3952	9	1251	5	416	45257
SaWD40-527	SA_27G130100	2999	9	1623	4	540	60698.6
SaWD40-3	SA_01G006100	3579	10	1479	6	492	52542.9
SaWD40-41	SA_02G008700	3212	10	1509	6	502	53878.4
SaWD40-43	SA_02G036700	7618	10	936	4	311	34073.3
SaWD40-53	SA_02G227400	7557	10	2610	8	869	97985.4
SaWD40-67	SA_02G395800	3120	10	1311	5	436	47075.8
SaWD40-79	SA_03G065900	4577	10	1500	3	499	53025
SaWD40-97	SA_04G104900	7932	10	1089	3	362	40920.3
SaWD40-131	SA_05G291000	6469	10	2091	6	696	76337
SaWD40-166	SA_07G002600	3820	10	1323	7	440	46972.7
SaWD40-196	SA_07G249800	19465	10	5034	8	1677	190056
SaWD40-199	SA_07G274800	4237	10	1560	6	519	55578.1
SaWD40-205	SA_08G004000	4059	10	1329	4	442	47148.8
SaWD40-208	SA_08G047700	3098	10	1305	5	434	47254.2
SaWD40-221	SA_08G168100	12036	10	951	6	316	35352.8
SaWD40-222	SA_08G170800	3427	10	1152	5	383	40947.7
SaWD40-231	SA_08G261800	3681	10	1539	7	512	55002.6
SaWD40-268	SA_10G144200	15582	10	1887	5	628	71066.2
SaWD40-279	SA_10G286900	5999	10	1434	5	477	51534.4
SaWD40-351	SA_13G091900	21630	10	2298	5	765	82250.9
SaWD40-352	SA_13G111000	5378	10	3003	7	1000	109500
SaWD40-372	SA_14G090700	8539	10	2295	4	764	82178.9
SaWD40-373	SA_14G113900	5319	10	3000	7	999	109643
SaWD40-379	SA_14G183500	17095	10	738	5	245	27617.7
SaWD40-394	SA_15G120300	29269	10	984	7	327	36196.1
SaWD40-399	SA_15G226400	3681	10	1182	5	393	42114.9
SaWD40-413	SA_16G140800	3341	10	921	6	306	34310.7
SaWD40-414	SA_16G143200	4057	10	1185	4	394	42282
SaWD40-438	SA_18G086200	5903	10	3018	7	1005	110049
SaWD40-447	SA_19G101900	11957	10	1677	7	558	62726.2
SaWD40-457	SA_21G024200	4079	10	1182	5	393	43593.1
SaWD40-458	SA_21G039200	19402	10	1068	7	355	39267.7
SaWD40-470	SA_22G022900	3021	10	1182	4	393	43537.9
SaWD40-471	SA_22G037200	5149	10	1068	7	355	39174.6
SaWD40-473	SA_22G064400	2768	10	2112	4	703	75935.8
SaWD40-497	SA_24G035500	5889	10	2553	13	850	92838.4
SaWD40-507	SA_25G033600	3608	10	1248	3	415	46148.8
SaWD40-509	SA_25G054200	4899	10	1077	7	358	39666.2
SaWD40-519	SA_26G027900	10323	10	1182	4	393	43684.3
SaWD40-521	SA_26G050300	4066	10	1077	7	358	39585.2
SaWD40-578	SA_31G015000	4271	10	1143	5	380	40675.5
SaWD40-579	SA_31G017500	12047	10	951	6	316	35352.8
SaWD40-28	SA_01G337200	8150	11	2445	8	814	89433.4
SaWD40-32	SA_01G342500	8416	11	1332	5	443	47902.8
SaWD40-62	SA_02G337800	4844	11	2445	8	814	89403.4
SaWD40-75	SA_03G037600	3767	11	1746	5	581	64313.1
SaWD40-91	SA_03G359900	3286	11	1185	8	394	42086.9
SaWD40-95	SA_04G070200	4614	11	1269	6	422	45182.1
SaWD40-106	SA_04G278500	3411	11	1191	8	396	42267
SaWD40-119	SA_05G155600	5631	11	1035	6	344	38060.9
SaWD40-130	SA_05G286300	4588	11	1161	6	386	41452.7
SaWD40-148	SA_06G156600	6994	11	1044	6	347	38118.9
SaWD40-184	SA_07G099300	5868	11	1671	6	556	58930.7
SaWD40-211	SA_08G052700	4873	11	2451	6	816	89519.4
SaWD40-218	SA_08G118800	6235	11	1680	7	559	59793.6
SaWD40-227	SA_08G202300	4713	11	1176	6	391	42745.3
SaWD40-242	SA_09G133400	6664	11	1566	7	521	55441.5
SaWD40-255	SA_09G409500	9755	11	1434	5	477	51870
SaWD40-275	SA_10G245100	6177	11	1209	7	402	42999.1
SaWD40-330	SA_12G189300	5372	11	1464	3	487	54487.2
SaWD40-331	SA_12G194000	13168	11	5067	4	1688	188647
SaWD40-357	SA_13G180200	8388	11	996	5	331	37003.9
SaWD40-395	SA_15G152600	6532	11	1683	7	560	59542.3
SaWD40-401	SA_15G256100	9657	11	1029	6	342	38112.9
SaWD40-406	SA_16G024300	5979	11	1551	5	516	58055.2
SaWD40-410	SA_16G094200	10905	11	1683	7	560	59564.2
SaWD40-416	SA_16G166400	6936	11	1029	6	342	38093.9
SaWD40-429	SA_17G116700	6300	11	1008	5	335	37310.4
SaWD40-442	SA_18G128800	2995	11	1095	3	364	39190.3
SaWD40-456	SA_20G173500	5710	11	1056	2	351	39421.6
SaWD40-483	SA_23G002500	4754	11	2736	12	911	99545.2
SaWD40-517	SA_26G003600	4098	11	1368	3	455	50156
SaWD40-532	SA_27G211600	9920	11	2622	6	873	93653.8
SaWD40-548	SA_28G166000	2900	11	1206	8	401	42788.8
SaWD40-554	SA_29G029300	10500	11	3234	6	1077	118598
SaWD40-581	SA_31G135200	12980	11	1662	3	553	59296.2
SaWD40-4	SA_01G018800	6441	12	2826	11	941	104272
SaWD40-9	SA_01G064600	7393	12	1893	6	630	68495.1
SaWD40-42	SA_02G023000	10983	12	2832	11	943	104406
SaWD40-47	SA_02G068300	6861	12	1896	6	631	68587.2
SaWD40-115	SA_05G090100	3669	12	1575	6	524	56942.7
SaWD40-144	SA_06G090600	3746	12	1428	6	475	51902.8
SaWD40-219	SA_08G121400	15628	12	2070	4	689	77218.8
SaWD40-236	SA_08G316000	5718	12	1398	6	465	51435.8
SaWD40-289	SA_11G017000	14576	12	4407	6	1468	163329
SaWD40-321	SA_12G087400	9519	12	1776	4	591	65889
SaWD40-324	SA_12G099300	14333	12	4404	6	1467	163169
SaWD40-348	SA_13G070000	5313	12	3027	6	1008	109053
SaWD40-369	SA_14G072800	5723	12	3027	6	1008	109144
SaWD40-378	SA_14G173700	4861	12	1143	4	380	40898.9
SaWD40-430	SA_17G124800	3021	12	1044	4	347	37682.6
SaWD40-433	SA_18G009000	5351	12	1524	7	507	55630.1
SaWD40-436	SA_18G057000	6497	12	3021	6	1006	108984
SaWD40-466	SA_21G148700	5116	12	1212	8	403	44747.9
SaWD40-498	SA_24G077300	9246	12	2376	4	791	88149.6
SaWD40-510	SA_25G137400	6181	12	1290	10	429	46559.7
SaWD40-511	SA_25G155000	8493	12	1290	5	429	47223.6
SaWD40-5	SA_01G032700	4041	13	1299	7	432	47027
SaWD40-24	SA_01G319500	4204	13	1428	4	475	51058.4
SaWD40-39	SA_02G003800	4404	13	1668	7	555	61351.1
SaWD40-71	SA_02G401800	5334	13	1881	6	626	68362.9
SaWD40-161	SA_06G291600	7567	13	1437	5	478	52270.9
SaWD40-169	SA_07G043100	3488	13	1293	7	430	46812.7
SaWD40-174	SA_07G049500	14278	13	1245	6	414	45353.8
SaWD40-191	SA_07G209300	4732	13	1299	7	432	47017.2
SaWD40-207	SA_08G043500	3119	13	1278	7	425	46246.1
SaWD40-210	SA_08G050600	4286	13	1245	6	414	45511
SaWD40-259	SA_09G429100	9201	13	3996	5	1331	144606
SaWD40-260	SA_09G453200	7446	13	2052	5	683	76169.3
SaWD40-271	SA_10G185600	4741	13	1491	3	496	55467.9
SaWD40-283	SA_10G309500	9602	13	3969	4	1322	143599
SaWD40-284	SA_10G333500	15409	13	1977	7	658	73339.1
SaWD40-291	SA_11G028600	24914	13	2034	7	677	75408.5
SaWD40-293	SA_11G052100	8042	13	3954	5	1317	143109
SaWD40-306	SA_11G190000	30198	13	2373	6	790	88826.5
SaWD40-319	SA_12G061400	8522	13	4107	5	1368	148344
SaWD40-335	SA_12G253000	10578	13	1572	6	523	58603.6
SaWD40-349	SA_13G071800	12700	13	3870	3	1289	139004
SaWD40-353	SA_13G122600	7665	13	1137	3	378	41120.6
SaWD40-370	SA_14G074500	8242	13	3840	5	1279	137940
SaWD40-396	SA_15G170300	3861	13	1452	3	483	53381.5
SaWD40-404	SA_15G270100	4175	13	1140	6	379	42484.2
SaWD40-411	SA_16G107800	3910	13	1452	3	483	53362.5
SaWD40-420	SA_16G183500	10237	13	1248	4	415	45415.3
SaWD40-421	SA_17G009400	5352	13	1218	7	405	43729.3
SaWD40-425	SA_17G067800	8779	13	3816	5	1271	137466
SaWD40-479	SA_22G148600	5008	13	1419	8	472	52430.6
SaWD40-484	SA_23G028200	7929	13	1062	6	353	39490.2
SaWD40-493	SA_23G124900	3331	13	1125	6	374	41948.5
SaWD40-494	SA_23G131200	7958	13	1524	6	507	55104.5
SaWD40-495	SA_24G005100	4575	13	1962	3	653	73098.9
SaWD40-496	SA_24G006800	3564	13	1056	6	351	39238.9
SaWD40-502	SA_24G190400	3403	13	1002	7	333	37395.2
SaWD40-505	SA_24G200500	4284	13	1518	6	505	54868.4
SaWD40-522	SA_26G139300	6465	13	1419	8	472	52448.5
SaWD40-70	SA_02G401200	7713	14	1314	5	437	47111.7
SaWD40-81	SA_03G176600	7868	14	1530	3	509	56692.4
SaWD40-100	SA_04G179800	9713	14	1533	5	510	56613.3
SaWD40-121	SA_05G171100	8756	14	1503	5	500	55433.9
SaWD40-132	SA_05G297300	13712	14	1542	4	513	57276.8
SaWD40-134	SA_05G314800	7563	14	2178	4	725	81120.8
SaWD40-149	SA_06G170800	7316	14	1509	5	502	55606.1
SaWD40-159	SA_06G281500	9075	14	1539	3	512	57191.8
SaWD40-187	SA_07G114500	4014	14	1329	5	442	48121.5
SaWD40-214	SA_08G067700	3843	14	1215	3	404	43072.5
SaWD40-239	SA_09G057200	9143	14	2454	3	817	89753.3
SaWD40-244	SA_09G157700	3912	14	1329	4	442	47955.2
SaWD40-265	SA_10G054400	10785	14	2469	3	822	90071.6
SaWD40-285	SA_10G349400	7006	14	2118	7	705	76485.2
SaWD40-356	SA_13G170000	5658	14	1155	4	384	41473.5
SaWD40-359	SA_13G218900	8932	14	1545	4	514	57596.1
SaWD40-381	SA_14G221100	10735	14	1533	3	510	57277.8
SaWD40-387	SA_14G260300	5979	14	1287	5	428	47176.8
SaWD40-397	SA_15G171100	6139	14	1335	6	444	48232.6
SaWD40-534	SA_27G245900	4893	14	2679	10	892	98279.8
SaWD40-546	SA_28G141200	4857	14	2688	11	895	98062.8
SaWD40-556	SA_29G043900	5415	14	2745	12	914	100394
SaWD40-564	SA_29G147300	12494	14	1671	7	556	62540.9
SaWD40-576	SA_30G219500	25285	14	1683	8	560	62988.3
SaWD40-1	SA_01G002600	12237	15	2703	1	900	100141
SaWD40-38	SA_01G396600	5698	15	2079	7	692	75205.4
SaWD40-59	SA_02G320900	3243	15	1560	6	519	55483.9
SaWD40-87	SA_03G246200	5239	15	1368	4	455	50320.2
SaWD40-104	SA_04G245100	6395	15	1371	4	456	50482.5
SaWD40-117	SA_05G125100	6993	15	1371	5	456	50389.3
SaWD40-126	SA_05G232300	6784	15	1551	5	516	58218.6
SaWD40-146	SA_06G124800	7294	15	1371	5	456	50312.1
SaWD40-153	SA_06G215600	5456	15	1551	6	516	58252.6
SaWD40-165	SA_07G001500	7426	15	2112	7	703	76221.6
SaWD40-204	SA_08G001400	16112	15	2112	7	703	76619
SaWD40-250	SA_09G320600	4690	15	1845	6	614	68320.2
SaWD40-262	SA_09G472000	4822	15	1170	7	389	43321.1
SaWD40-287	SA_11G006900	5437	15	1158	7	385	42806.4
SaWD40-290	SA_11G027000	3692	15	1065	6	354	38937.6
SaWD40-322	SA_12G089400	4279	15	1065	6	354	38932.6
SaWD40-374	SA_14G125900	3902	15	1263	5	420	46185.7
SaWD40-477	SA_22G118700	10682	15	2412	5	803	87648.6
SaWD40-490	SA_23G107000	5508	15	2121	5	706	78122.5
SaWD40-569	SA_30G044400	5339	15	2757	11	918	100848
SaWD40-35	SA_01G378900	13257	16	1890	6	629	71784.5
SaWD40-65	SA_02G358500	12080	16	1965	6	654	74589
SaWD40-86	SA_03G240900	9704	16	2664	1	887	98130.8
SaWD40-123	SA_05G186500	15934	16	7368	3	2455	269370
SaWD40-137	SA_05G327900	5335	16	1440	7	479	52793.2
SaWD40-155	SA_06G248300	7562	16	1440	7	479	52898.3
SaWD40-179	SA_07G067700	4158	16	1806	6	601	64508.6
SaWD40-188	SA_07G140300	10535	16	2412	4	803	86971.1
SaWD40-247	SA_09G236900	7910	16	2406	8	801	86960
SaWD40-288	SA_11G009500	12679	16	2292	7	763	83228.9
SaWD40-350	SA_13G086200	5603	16	2196	3	731	80521.3
SaWD40-363	SA_13G260200	6394	16	1440	7	479	52773.2
SaWD40-371	SA_14G089600	4937	16	2286	3	761	84033.4
SaWD40-427	SA_17G092300	4211	16	1461	6	486	53120.8
SaWD40-439	SA_18G098200	4025	16	1428	6	475	51654.3
SaWD40-464	SA_21G115800	6282	16	2397	9	798	86219
SaWD40-553	SA_29G006100	9192	16	2643	5	880	96024.5
SaWD40-13	SA_01G174900	7360	17	3789	5	1262	139421
SaWD40-89	SA_03G282800	7042	17	2493	7	830	90882.2
SaWD40-114	SA_05G088000	17163	17	2490	5	829	91038.4
SaWD40-139	SA_06G001200	5497	17	2574	7	857	94753.8
SaWD40-143	SA_06G088800	8612	17	2490	7	829	91028.3
SaWD40-167	SA_07G018800	11989	17	2034	6	677	77129.8
SaWD40-185	SA_07G102900	11210	17	2259	6	752	82520.1
SaWD40-206	SA_08G019400	8151	17	2034	6	677	77100.8
SaWD40-243	SA_09G137400	11758	17	2259	6	752	82341.9
SaWD40-261	SA_09G469400	7271	17	2394	7	797	87094.2
SaWD40-273	SA_10G215900	10754	17	2214	4	737	82560.1
SaWD40-286	SA_10G352300	5115	17	1149	6	382	42413.1
SaWD40-312	SA_12G010300	5207	17	1140	6	379	42077.7
SaWD40-325	SA_12G110700	9908	17	2388	7	795	86646.7
SaWD40-419	SA_16G177000	10045	17	1902	6	633	70668.1
SaWD40-448	SA_19G132500	7800	17	3906	5	1301	144018
SaWD40-454	SA_20G101700	13683	17	3882	5	1293	143411
SaWD40-461	SA_21G063400	15746	17	2259	6	752	82172.7
SaWD40-537	SA_27G269300	7383	17	1359	7	452	52080.4
SaWD40-550	SA_28G182500	6690	17	1359	7	452	52009.2
SaWD40-562	SA_29G110400	13670	17	1107	2	368	41827.9
SaWD40-77	SA_03G055200	10492	18	2676	7	891	98148.1
SaWD40-80	SA_03G095300	12638	18	1731	5	576	65141.4
SaWD40-98	SA_04G151800	10217	18	1941	1	646	73031.7
SaWD40-101	SA_04G184400	11509	18	2643	7	880	96223.5
SaWD40-110	SA_05G009300	7738	18	2109	7	702	77607.4
SaWD40-120	SA_05G167400	13583	18	2709	6	902	99325.6
SaWD40-124	SA_05G208500	17205	18	2547	7	848	93014
SaWD40-154	SA_06G238800	28804	18	2580	7	859	94294.2
SaWD40-249	SA_09G318000	9389	18	1581	6	526	57556.3
SaWD40-266	SA_10G067800	15246	18	2619	5	872	96919.6
SaWD40-270	SA_10G183600	8436	18	1581	7	526	57666.4
SaWD40-303	SA_11G166700	10492	18	1581	6	526	57728.3
SaWD40-361	SA_13G243600	8455	18	2718	11	905	101254
SaWD40-384	SA_14G243900	12301	18	2718	11	905	101080
SaWD40-437	SA_18G068600	31783	18	2424	4	807	89006.9
SaWD40-474	SA_22G067000	20331	18	4131	6	1376	150302
SaWD40-536	SA_27G269200	13743	18	2751	5	916	99814.1
SaWD40-549	SA_28G182400	9017	18	2748	5	915	99737.9
SaWD40-566	SA_30G008300	18042	18	2748	5	915	100035
SaWD40-30	SA_01G341300	17301	19	10746	5	3581	398311
SaWD40-69	SA_02G397000	19989	19	10731	5	3576	397989
SaWD40-82	SA_03G180500	12316	19	2616	5	871	95404.5
SaWD40-135	SA_05G317100	20860	19	1914	6	637	71065.2
SaWD40-157	SA_06G261700	8179	19	1971	6	656	73313.9
SaWD40-172	SA_07G047500	24075	19	10737	5	3578	397587
SaWD40-201	SA_07G305000	10874	19	2670	6	889	99326.3
SaWD40-209	SA_08G048100	19596	19	10743	5	3580	397453
SaWD40-362	SA_13G246000	7477	19	1974	6	657	73558.3
SaWD40-385	SA_14G246000	7040	19	1974	6	657	73253.9
SaWD40-504	SA_24G194000	29090	19	2088	6	695	77853.7
SaWD40-50	SA_02G174100	13141	20	4212	4	1403	156012
SaWD40-197	SA_07G267600	6463	20	3984	5	1327	147391
SaWD40-390	SA_15G016300	22074	20	2703	7	900	98557.1
SaWD40-152	SA_06G214500	18859	21	5475	5	1824	203979
SaWD40-405	SA_16G012100	20393	21	2691	7	896	98024.6
SaWD40-8	SA_01G060800	18100	22	5016	7	1671	187863
SaWD40-46	SA_02G065000	20219	22	5016	7	1671	187727
SaWD40-127	SA_05G233100	11447	22	4764	5	1587	175415
SaWD40-195	SA_07G239200	24508	22	4998	7	1665	186754
SaWD40-469	SA_21G191700	9281	22	3378	6	1125	121623
SaWD40-482	SA_22G189600	9993	22	3396	6	1131	122058
SaWD40-485	SA_23G030300	8820	22	3165	4	1054	117023
SaWD40-506	SA_25G024100	10219	22	2271	5	756	82980.4
SaWD40-516	SA_25G216000	9195	22	3360	6	1119	120869
SaWD40-518	SA_26G007000	15924	22	2271	6	756	82969.4
SaWD40-523	SA_26G209400	9320	22	3360	6	1119	121313
SaWD40-217	SA_08G098400	9362	23	4080	5	1359	149552
SaWD40-234	SA_08G296300	22946	23	5163	7	1720	192813
SaWD40-412	SA_16G113600	9544	23	4077	5	1358	149125
SaWD40-475	SA_22G077900	9175	23	4080	5	1359	149357
SaWD40-513	SA_25G193700	9782	23	3354	3	1117	121243
SaWD40-571	SA_30G056800	8321	23	2826	8	941	104386
SaWD40-582	SA_31G154900	8918	23	4077	5	1358	149355
SaWD40-151	SA_06G187500	24323	24	9942	3	3313	364507
SaWD40-238	SA_09G039700	8514	24	2772	13	923	104268
SaWD40-309	SA_11G280500	18823	24	2721	12	906	102062
SaWD40-338	SA_12G389100	9557	24	2769	15	922	103914
SaWD40-344	SA_13G050500	11826	24	2754	11	917	103375
SaWD40-558	SA_29G054700	8469	24	3057	9	1018	112765
SaWD40-10	SA_01G090500	10991	25	3390	14	1129	124970
SaWD40-72	SA_03G012400	8584	25	3390	15	1129	124972
SaWD40-93	SA_04G034300	8575	25	3390	15	1129	124807
SaWD40-129	SA_05G269000	8284	25	3390	12	1129	124903
SaWD40-140	SA_06G012000	10160	25	2979	7	992	108621
SaWD40-162	SA_06G310100	9094	25	3294	14	1097	121413
SaWD40-235	SA_08G315600	7998	25	3396	11	1131	124777
SaWD40-264	SA_10G037300	9408	25	2763	14	920	104117
SaWD40-382	SA_14G226800	9140	25	2715	11	904	101776
SaWD40-402	SA_15G260900	13198	25	3411	11	1136	125392
SaWD40-417	SA_16G169500	8806	25	3411	11	1136	125460
SaWD40-422	SA_17G014000	14399	25	2709	12	902	101761
SaWD40-434	SA_18G013600	14412	25	2709	12	902	101727
SaWD40-460	SA_21G060100	27709	25	6375	3	2124	234964
SaWD40-489	SA_23G106900	8465	25	3423	12	1140	125853
SaWD40-501	SA_24G179000	8553	25	3414	12	1137	125485
SaWD40-366	SA_14G019500	14922	26	2700	11	899	101270
SaWD40-48	SA_02G094300	14172	27	3501	13	1166	129290
SaWD40-203	SA_07G326700	8857	27	3465	14	1154	127461
SaWD40-462	SA_21G074100	17125	27	5586	4	1861	203486
SaWD40-125	SA_05G214900	22120	29	5061	5	1686	181066
SaWD40-122	SA_05G178900	38220	30	3495	6	1164	129514
SaWD40-314	SA_12G032500	25456	30	8421	3	2806	307177
SaWD40-150	SA_06G178700	32292	31	3609	6	1202	133759
SaWD40-278	SA_10G280800	17998	31	8616	2	2871	314339
SaWD40-531	SA_27G205100	19237	31	8616	3	2871	312617
SaWD40-544	SA_28G123400	26994	31	8616	3	2871	312120
SaWD40-230	SA_08G231900	20475	32	5835	6	1944	214463
SaWD40-386	SA_14G257600	25173	38	9525	5	3174	358166
SaWD40-340	SA_12G412400	27758	39	9693	5	3230	360477
SaWD40-311	SA_11G301900	52866	41	9834	5	3277	365933

## Sheet: Table S3
Table S3. Segmental and tandem duplication pairs of WD40 genes and Ka/ks values
Segmental tandem duplication pairs of WD40 genes and Ka/ks values								Tandem tandem duplication pairs of WD40 genes and Ka/ks values
Seq_1	Seq_2	Ka	Ks	Ka_Ks				Seq_1	Seq_2	Ka	Ks	Ka_Ks
SA_17G009400.m1	SA_18G009000.m1	0	0	NaN				SA_01G326600.m1	SA_01G326200.m1	0.0112521	0.0598913	0.187876
SA_09G469400.m1	SA_10G349400.m1	0	0.00210084	0				SA_07G062500.m1	SA_07G062600.m1	0.0115658	0.0323081	0.357985
SA_08G168100.m1	SA_31G017500.m1	0	0.084963	0				SA_08G189300.m1	SA_08G189200.m1	0.013509	0.0395097	0.341915
SA_05G232300.m1	SA_06G215600.m1	0.000838809	0.0864479	0.00970305				SA_10G207100.m1	SA_10G037300.m1	0.496961	0.628206	0.79108
SA_01G301100.m1	SA_02G301000.m1	0.00295883	0.111422	0.0265551				SA_13G051300.m1	SA_13G051400.m1	0.0159087	0.0429199	0.37066
SA_16G140800.m1	SA_31G017500.m1	0.0114684	0.28502	0.0402372				SA_13G070000.m1	SA_13G000300.m1	0.0878688	0.192127	0.457348
SA_21G148700.m1	SA_26G139300.m1	0.00867532	0.21207	0.0409078				SA_14G226800.m2	SA_14G019500.m1	0.11526	2.03759	0.0565668
SA_19G033500.m1	SA_20G022800.m1	0.00269361	0.0635525	0.042384				SA_15G029800.m1	SA_15G029900.m1	0.190644	0.327718	0.581732
SA_14G149400.m1	SA_17G142500.m1	0.0106789	0.248094	0.0430436				SA_16G024400.m1	SA_16G024300.m1	0.00493829	0.0173118	0.285256
SA_08G168100.m1	SA_16G140800.m1	0.0114643	0.252121	0.0454713				SA_24G194000.m1	SA_24G190400.m1	0.119833	0.269721	0.444284
SA_03G246200.m1	SA_05G125100.m1	0.0105206	0.226452	0.0464586						0.106774	0.364731	0.38747
SA_22G148600.m1	SA_26G139300.m1	0.0111122	0.205607	0.0540457
SA_03G246200.m1	SA_06G124800.m1	0.0134018	0.227373	0.0589418
SA_11G280500.m1	SA_18G013600.m1	0.113909	1.88511	0.0604253
SA_05G125100.m1	SA_06G124800.m1	0.00474911	0.0776409	0.0611675
SA_05G319000.m1	SA_06G259000.m1	0.00378112	0.0616408	0.0613412
SA_12G049100.m1	SA_30G041600.m1	0.0823278	1.24175	0.0662996
SA_13G180200.m1	SA_17G116700.m1	0.0130495	0.196319	0.0664709
SA_04G245100.m1	SA_05G125100.m1	0.0172476	0.248203	0.0694899
SA_11G063600.m1	SA_12G049100.m1	0.00566709	0.0763824	0.0741936
SA_02G141700.m1	SA_08G197000.m1	0.0224489	0.297582	0.0754378
SA_11G063600.m1	SA_30G041600.m1	0.0898456	1.1723	0.0766407
SA_15G260900.m1	SA_23G106900.m1	0.0173842	0.224255	0.0775198
SA_04G245100.m1	SA_06G124800.m1	0.0191704	0.244685	0.0783472
SA_02G311500.m1	SA_07G075400.m1	0.0145382	0.179994	0.0807701
SA_17G092300.m1	SA_18G098200.m1	0.00816581	0.0996317	0.08196
SA_15G260900.m1	SA_24G179000.m1	0.018951	0.231035	0.0820267
SA_23G106900.m1	SA_24G179000.m1	0.00458966	0.0552579	0.0830589
SA_09G428400.m1	SA_16G024300.m1	0.391889	4.68021	0.0837333
SA_05G327900.m1	SA_13G260200.m1	0.0101097	0.120416	0.0839561
SA_10G308600.m1	SA_16G024300.m1	0.396318	4.70919	0.0841585
SA_06G248300.m1	SA_13G260200.m1	0.0119662	0.141178	0.0847597
SA_02G141700.m1	SA_07G203700.m1	0.0252762	0.297865	0.0848578
SA_16G169500.m1	SA_23G106900.m1	0.0183631	0.21318	0.0861391
SA_01G141000.m1	SA_08G197000.m1	0.02257	0.259889	0.0868449
SA_12G049100.m1	SA_29G041200.m1	0.11119	1.25842	0.0883569
SA_11G063600.m1	SA_29G041200.m1	0.111101	1.23409	0.0900264
SA_01G227100.m1	SA_20G034800.m1	0.0215614	0.233084	0.0925048
SA_15G270100.m1	SA_23G124900.m1	0.0199542	0.213189	0.0935989
SA_16G169500.m1	SA_24G179000.m1	0.0199322	0.208072	0.0957946
SA_01G141000.m1	SA_07G203700.m1	0.0254633	0.259935	0.09796
SA_12G389900.m1	SA_13G227500.m1	0.0876198	0.893192	0.0980974
SA_08G177300.m1	SA_31G010800.m1	0.0111139	0.11173	0.0994706
SA_10G297800.m1	SA_30G041600.m1	0.131826	1.32118	0.099779
SA_12G389900.m1	SA_14G228500.m1	0.0876307	0.877293	0.0998876
SA_15G256100.m1	SA_16G166400.m1	0.00631649	0.0631715	0.0999896
SA_01G244400.m1	SA_19G033500.m1	0.0149343	0.147743	0.101083
SA_14G032400.m1	SA_18G022800.m1	0.0316143	0.309764	0.10206
SA_14G032400.m1	SA_17G023500.m1	0.0316143	0.309764	0.10206
SA_01G227100.m1	SA_19G039300.m1	0.0220837	0.215729	0.102368
SA_01G326200.m1	SA_08G062000.m1	0.0192896	0.187499	0.102878
SA_09G418000.m1	SA_30G041600.m1	0.120695	1.16694	0.103428
SA_09G345300.m1	SA_12G134200.m1	0.0212344	0.204982	0.103592
SA_01G326200.m1	SA_07G062500.m1	0.0194728	0.185277	0.1051
SA_15G260900.m1	SA_16G169500.m1	0.00749046	0.0708198	0.105768
SA_13G037900.m1	SA_18G022800.m1	0.0346069	0.321652	0.107591
SA_13G037900.m1	SA_17G023500.m1	0.0346069	0.321652	0.107591
SA_07G203700.m1	SA_08G197000.m1	0.00806253	0.0749261	0.107606
SA_07G209300.m1	SA_08G202300.m1	0.0124332	0.115205	0.107922
SA_01G244400.m1	SA_20G022800.m1	0.0149377	0.137808	0.108395
SA_11G281900.m1	SA_13G227500.m1	0.106909	0.980383	0.109048
SA_27G269300.m1	SA_28G182500.m1	0.0057813	0.05274	0.109619
SA_09G342000.m1	SA_11G138300.m1	0.0269333	0.245524	0.109697
SA_10G297800.m1	SA_29G041200.m1	0.139791	1.272	0.109898
SA_02G244500.m1	SA_19G033500.m1	0.0162958	0.148075	0.110051
SA_09G345300.m1	SA_11G134300.m1	0.0258315	0.233521	0.110617
SA_01G187400.m1	SA_02G185600.m1	0.00539328	0.0486179	0.110932
SA_13G199400.m1	SA_14G202000.m1	0.0122771	0.109142	0.112487
SA_03G246200.m1	SA_04G245100.m1	0.00763365	0.0670838	0.113793
SA_02G244500.m1	SA_20G022800.m1	0.0162995	0.143024	0.113963
SA_11G281900.m1	SA_14G228500.m1	0.106725	0.933898	0.114279
SA_05G303600.m1	SA_12G389900.m1	0.0947916	0.82748	0.114555
SA_02G311500.m1	SA_08G076000.m1	0.0221828	0.192652	0.115144
SA_12G060600.m1	SA_16G024300.m1	0.376413	3.18548	0.118165
SA_02G327300.m1	SA_08G062000.m1	0.0226981	0.191351	0.11862
SA_06G274600.m1	SA_12G389900.m1	0.0931428	0.775152	0.120161
SA_01G310500.m1	SA_07G075400.m1	0.0216326	0.179559	0.120476
SA_09G039700.m1	SA_12G389100.m1	0.0229776	0.187884	0.122297
SA_05G303600.m1	SA_11G281900.m1	0.113956	0.92704	0.122925
SA_09G418000.m1	SA_29G041200.m1	0.151366	1.22857	0.123205
SA_01G342300.m1	SA_02G396000.m1	0.0112443	0.0909746	0.123598
SA_10G352300.m1	SA_12G010300.m1	0.0307666	0.248221	0.123948
SA_02G327300.m1	SA_07G062500.m1	0.0229032	0.184715	0.123992
SA_22G160800.m1	SA_25G177300.m1	0.0234826	0.188777	0.124393
SA_10G037300.m1	SA_12G389100.m1	0.0259509	0.207611	0.124997
SA_07G056300.m1	SA_08G056400.m1	0.00984543	0.0785601	0.125324
SA_06G261700.m1	SA_14G246000.m1	0.0256147	0.204052	0.12553
SA_01G090500.m1	SA_08G315600.m1	0.0224521	0.175078	0.12824
SA_06G248300.m1	SA_14G260300.m1	0.0176037	0.135317	0.130092
SA_23G028200.m1	SA_24G006800.m1	0.0137304	0.105205	0.130511
SA_07G313000.m1	SA_08G223300.m1	0.00843082	0.0643971	0.130919
SA_09G469400.m1	SA_11G009500.m1	0.026313	0.200088	0.131508
SA_06G274600.m1	SA_13G227500.m1	0.0252206	0.191471	0.13172
SA_04G184400.m1	SA_05G167400.m1	0.0313648	0.235858	0.132981
SA_01G378900.m1	SA_07G018800.m1	0.0311125	0.233042	0.133506
SA_13G246000.m1	SA_14G246000.m1	0.00965982	0.0717679	0.134598
SA_05G327900.m1	SA_06G248300.m1	0.00917583	0.0675648	0.135808
SA_07G114500.m1	SA_15G171100.m1	0.0325668	0.239496	0.135981
SA_06G261700.m1	SA_13G246000.m1	0.0290659	0.21228	0.136922
SA_06G274600.m1	SA_11G281900.m1	0.112449	0.819182	0.13727
SA_02G358500.m1	SA_07G018800.m1	0.0323565	0.235371	0.13747
SA_01G332300.m1	SA_07G056300.m1	0.024825	0.18021	0.137756
SA_09G157700.m1	SA_15G171100.m1	0.0315917	0.229326	0.137759
SA_10G219800.m1	SA_12G134200.m1	0.0244715	0.176901	0.138335
SA_05G303600.m1	SA_13G227500.m1	0.0265428	0.191316	0.138738
SA_13G273500.m1	SA_14G274500.m1	0.0117742	0.0845966	0.13918
SA_03G180500.m1	SA_05G167400.m1	0.0303588	0.217233	0.139752
SA_13G146500.m1	SA_17G142500.m1	0.0298052	0.209485	0.142278
SA_19G039300.m1	SA_20G034800.m1	0.0136024	0.0949347	0.143282
SA_10G308600.m1	SA_12G060600.m1	0.0311823	0.216894	0.143768
SA_10G349400.m1	SA_11G009500.m1	0.0286369	0.196769	0.145536
SA_03G352100.m1	SA_05G016600.m1	0.0349306	0.239584	0.145797
SA_02G358500.m1	SA_08G019400.m1	0.0337576	0.228945	0.147449
SA_10G219800.m1	SA_11G134300.m1	0.0308018	0.208489	0.147738
SA_01G310500.m1	SA_08G076000.m1	0.0287481	0.194565	0.147756
SA_01G378900.m1	SA_08G019400.m1	0.0339813	0.229643	0.147975
SA_09G472000.m1	SA_11G006900.m1	0.0406635	0.274324	0.148231
SA_03G352100.m1	SA_04G290500.m1	0.0178752	0.120009	0.148949
SA_15G268000.m1	SA_23G123100.m1	0.0386609	0.259356	0.149065
SA_03G012400.m1	SA_06G310100.m1	0.0299525	0.200888	0.1491
SA_21G148700.m1	SA_22G148600.m1	0.0054147	0.0362937	0.149191
SA_04G034300.m1	SA_06G310100.m1	0.0305811	0.204915	0.149238
SA_02G340200.m1	SA_07G049200.m1	0.0320483	0.213992	0.149764
SA_02G094300.m1	SA_08G315600.m1	0.0295863	0.197028	0.150163
SA_01G090500.m1	SA_07G326700.m1	0.0295318	0.196241	0.150488
SA_10G308600.m1	SA_11G052700.m1	0.0312081	0.207209	0.150611
SA_09G472000.m1	SA_12G010300.m1	0.0438864	0.290769	0.150932
SA_07G099300.m1	SA_16G094200.m1	0.136922	0.905245	0.151254
SA_01G301500.m1	SA_02G301500.m1	0.0157417	0.103877	0.151542
SA_07G099300.m1	SA_15G152600.m1	0.133761	0.88183	0.151686
SA_13G227500.m1	SA_14G228500.m1	0.0115523	0.0760995	0.151805
SA_21G039200.m1	SA_25G054200.m1	0.0416716	0.273812	0.152191
SA_05G327900.m1	SA_14G260300.m1	0.016551	0.108613	0.152385
SA_11G271600.m1	SA_12G378300.m1	0.0202852	0.132347	0.153273
SA_01G341300.m1	SA_07G047500.m1	0.0286753	0.186354	0.153875
SA_04G290500.m1	SA_06G019000.m1	0.0455558	0.295847	0.153984
SA_04G034300.m1	SA_05G269000.m1	0.0322024	0.208856	0.154184
SA_14G019500.m1	SA_17G014000.m1	0.0312353	0.201976	0.154649
SA_15G268000.m1	SA_24G193300.m1	0.0389906	0.251895	0.154789
SA_11G280500.m1	SA_12G389100.m1	0.00933064	0.0600574	0.155362
SA_08G118800.m1	SA_16G094200.m1	0.028898	0.185775	0.155554
SA_03G012400.m1	SA_05G269000.m1	0.030989	0.199092	0.155652
SA_02G333100.m1	SA_07G056300.m1	0.0284462	0.182717	0.155685
SA_07G099300.m1	SA_31G135200.m1	0.150185	0.958258	0.156727
SA_07G274800.m1	SA_08G261800.m1	0.0105543	0.0668296	0.157928
SA_07G099300.m1	SA_08G118800.m1	0.144227	0.913024	0.157966
SA_01G244400.m1	SA_02G244500.m1	0.0121899	0.0771006	0.158104
SA_07G043100.m1	SA_08G043500.m1	0.00943326	0.0594534	0.158667
SA_01G341300.m1	SA_08G048100.m1	0.0287998	0.181247	0.158898
SA_01G141000.m1	SA_02G141700.m1	0.0140255	0.0881951	0.159028
SA_10G352300.m1	SA_11G006900.m1	0.0479622	0.30137	0.159147
SA_16G175500.m1	SA_24G193300.m1	0.0369169	0.231244	0.159645
SA_16G175500.m1	SA_23G123100.m1	0.0381023	0.238625	0.159674
SA_04G290500.m1	SA_05G016600.m1	0.0458601	0.285925	0.160392
SA_22G037200.m1	SA_25G054200.m1	0.0392735	0.244843	0.160403
SA_03G352100.m1	SA_06G019000.m1	0.0444972	0.277326	0.160451
SA_08G118800.m1	SA_15G152600.m1	0.0280838	0.173025	0.16231
SA_14G019500.m1	SA_18G013600.m1	0.032222	0.198182	0.162588
SA_01G332300.m1	SA_08G056400.m1	0.0255465	0.15677	0.162955
SA_06G274600.m1	SA_14G228500.m1	0.0294134	0.17924	0.164101
SA_25G216000.m1	SA_26G209400.m1	0.0122666	0.0739819	0.165805
SA_09G039700.m1	SA_10G037300.m1	0.0110586	0.0666637	0.165886
SA_02G301500.m1	SA_08G083800.m1	0.0394828	0.23689	0.166672
SA_11G127200.m1	SA_12G142900.m1	0.0102067	0.0611145	0.16701
SA_15G270100.m1	SA_24G190400.m1	0.044361	0.265347	0.167181
SA_29G147300.m1	SA_30G219500.m1	0.0123174	0.0732289	0.168205
SA_11G052700.m1	SA_12G060600.m1	0.00770967	0.0454155	0.169759
SA_09G469400.m1	SA_12G110700.m1	0.0312809	0.18393	0.170069
SA_28G182700.m1	SA_30G008100.m1	0.0498732	0.289229	0.172435
SA_14G183500.m1	SA_17G116700.m1	0.0412772	0.238655	0.172957
SA_05G016600.m1	SA_06G019000.m1	0.0123017	0.0704034	0.174731
SA_07G018800.m1	SA_08G019400.m1	0.0102599	0.0586545	0.17492
SA_02G397000.m1	SA_07G047500.m1	0.0304208	0.173599	0.175236
SA_13G170000.m1	SA_17G124800.m1	0.0434498	0.245399	0.177058
SA_08G098400.m1	SA_31G154900.m1	0.0120224	0.0678124	0.177288
SA_01G006100.m1	SA_08G261800.m1	0.0440855	0.247109	0.178405
SA_01G301500.m1	SA_08G083800.m1	0.0411134	0.229625	0.179046
SA_13G170000.m1	SA_18G128800.m1	0.0365809	0.203996	0.179321
SA_21G191700.m1	SA_25G216000.m1	0.0337181	0.187866	0.179479
SA_02G397000.m1	SA_08G048100.m1	0.0304824	0.169325	0.180023
SA_01G301500.m1	SA_07G082500.m1	0.0401634	0.222481	0.180525
SA_05G317100.m1	SA_14G246000.m1	0.0377636	0.208629	0.181009
SA_02G094300.m1	SA_07G326700.m1	0.0410552	0.226695	0.181103
SA_11G017000.m1	SA_12G099300.m1	0.0108159	0.0595255	0.181701
SA_05G303600.m1	SA_14G228500.m1	0.0307447	0.168336	0.182638
SA_01G018800.m1	SA_02G023000.m1	0.0116241	0.0636396	0.182655
SA_22G189600.m1	SA_25G216000.m1	0.0355524	0.194542	0.182749
SA_01G090500.m1	SA_02G094300.m1	0.0149819	0.0814233	0.184
SA_16G177000.m1	SA_24G190400.m1	0.0461221	0.25049	0.184127
SA_04G104900.m1	SA_06G215600.m1	0.0414327	0.22436	0.184671
SA_16G094200.m1	SA_31G135200.m1	0.0341222	0.184761	0.184683
SA_21G160700.m1	SA_25G177300.m1	0.0269739	0.145982	0.184776
SA_02G333100.m1	SA_08G056400.m1	0.0298972	0.161791	0.184789
SA_04G104900.m1	SA_05G232300.m1	0.042143	0.227407	0.185319
SA_01G006100.m1	SA_07G274800.m1	0.0459914	0.24763	0.185726
SA_09G453200.m1	SA_11G028600.m1	0.038851	0.208093	0.1867
SA_14G173700.m1	SA_18G128800.m1	0.0411575	0.220228	0.186886
SA_07G102900.m1	SA_09G137400.m1	0.0117041	0.0624751	0.187341
SA_13G070000.m1	SA_14G072800.m1	0.0152622	0.0808763	0.18871
SA_03G012400.m1	SA_04G034300.m1	0.0089062	0.047064	0.189236
SA_09G057200.m1	SA_10G054400.m1	0.011702	0.0617024	0.189652
SA_10G286900.m1	SA_11G073500.m1	0.0430338	0.226711	0.189818
SA_27G189900.m1	SA_29G067600.m1	0.0417765	0.219084	0.190687
SA_14G173700.m1	SA_17G124800.m1	0.0514681	0.269567	0.190929
SA_06G281500.m1	SA_14G221100.m1	0.0269048	0.140597	0.191361
SA_15G152600.m1	SA_16G094200.m1	0.0134373	0.0700899	0.191716
SA_13G070000.m1	SA_18G057000.m1	0.0405083	0.211024	0.191961
SA_01G370000.m1	SA_21G024200.m1	0.210924	1.09782	0.192129
SA_03G252600.m1	SA_05G117700.m1	0.0436165	0.226955	0.192181
SA_01G339000.m1	SA_02G340200.m1	0.0134028	0.0693787	0.193184
SA_05G317100.m1	SA_13G246000.m1	0.0413801	0.214173	0.193209
SA_25G024100.m1	SA_26G007000.m1	0.014282	0.0734202	0.194524
SA_02G045300.m1	SA_07G217900.m1	0.0359994	0.185031	0.194559
SA_11G073500.m1	SA_12G038700.m1	0.0216715	0.111089	0.195082
SA_01G370000.m1	SA_26G027900.m1	0.200947	1.02847	0.195384
SA_01G326200.m1	SA_02G327300.m1	0.0119698	0.0609596	0.196356
SA_27G189900.m1	SA_30G073400.m1	0.0483393	0.245805	0.196657
SA_10G333500.m1	SA_11G028600.m1	0.0391765	0.199099	0.196769
SA_13G000300.m1	SA_18G057000.m1	0.0520459	0.264003	0.197141
SA_02G337800.m1	SA_07G051700.m1	0.0489063	0.246753	0.198199
SA_03G180500.m1	SA_04G184400.m1	0.0175352	0.08831	0.198564
SA_11G301900.m1	SA_14G257600.m1	0.205184	1.03201	0.198819
SA_02G395800.m1	SA_08G047700.m1	0.0508274	0.255394	0.199016
SA_13G111000.m1	SA_18G086200.m1	0.0412562	0.207139	0.199172
SA_08G118800.m1	SA_31G135200.m1	0.0119907	0.0601367	0.19939
SA_16G113600.m1	SA_22G077900.m1	0.0100499	0.0501609	0.200352
SA_07G062500.m1	SA_08G062000.m1	0.0115304	0.057345	0.20107
SA_02G227400.m1	SA_20G034800.m1	0.0534259	0.265137	0.201503
SA_10G349400.m1	SA_12G110700.m1	0.0354165	0.174722	0.202702
SA_15G152600.m1	SA_31G135200.m1	0.0349586	0.171897	0.20337
SA_02G337800.m1	SA_08G052700.m1	0.0485441	0.237457	0.204433
SA_12G032500.m1	SA_28G123400.m1	0.197694	0.965274	0.204806
SA_04G251800.m1	SA_05G117700.m1	0.0456618	0.222797	0.204948
SA_05G297300.m1	SA_14G221100.m1	0.02481	0.120874	0.205254
SA_02G301000.m1	SA_07G083100.m1	0.0366178	0.177171	0.206681
SA_12G032500.m1	SA_27G205100.m1	0.198563	0.959727	0.206896
SA_05G254700.m1	SA_06G323600.m1	0.0116387	0.0560245	0.207743
SA_16G177000.m1	SA_23G124900.m1	0.0587855	0.282416	0.208152
SA_09G418000.m1	SA_12G049100.m1	0.0433775	0.20803	0.208516
SA_03G252600.m1	SA_06G117700.m1	0.0423858	0.202602	0.209207
SA_14G072800.m1	SA_18G057000.m1	0.0446428	0.210908	0.211669
SA_14G113900.m1	SA_18G086200.m1	0.0438343	0.206396	0.21238
SA_09G318000.m1	SA_10G183600.m1	0.0134589	0.0633695	0.212388
SA_03G047300.m1	SA_04G001800.m1	0.0266284	0.125371	0.212396
SA_21G074100.m1	SA_22G077900.m1	0.0135273	0.0632873	0.213744
SA_01G337200.m1	SA_08G052700.m1	0.0470346	0.219852	0.213937
SA_05G303600.m1	SA_06G274600.m1	0.0154082	0.0719653	0.214106
SA_02G320900.m1	SA_07G067700.m1	0.0481121	0.223777	0.215
SA_27G245900.m1	SA_29G043900.m1	0.0417771	0.193483	0.215921
SA_05G009300.m1	SA_06G012000.m1	0.0172439	0.0795085	0.216882
SA_13G243600.m1	SA_14G243900.m1	0.0142677	0.0657294	0.217068
SA_07G102900.m1	SA_21G063400.m1	0.0446954	0.205877	0.217098
SA_09G137400.m1	SA_21G063400.m1	0.0450225	0.206809	0.217701
SA_21G191700.m1	SA_22G189600.m1	0.00941497	0.0432048	0.217915
SA_01G301100.m1	SA_07G083100.m1	0.0355829	0.163128	0.218129
SA_09G429100.m1	SA_11G052100.m1	0.0437049	0.200155	0.218356
SA_10G280800.m1	SA_27G205100.m1	0.196344	0.894674	0.219458
SA_10G286900.m1	SA_12G038700.m1	0.0485273	0.221123	0.219459
SA_27G245900.m1	SA_30G044400.m1	0.0423393	0.192794	0.219609
SA_09G409500.m1	SA_11G073500.m1	0.0492066	0.223043	0.220615
SA_09G345300.m1	SA_10G219800.m1	0.0219154	0.0993184	0.220658
SA_01G339000.m1	SA_07G049200.m1	0.051326	0.23235	0.2209
SA_21G191700.m1	SA_26G209400.m1	0.0359639	0.162272	0.221628
SA_10G280800.m1	SA_28G123400.m1	0.197716	0.890505	0.222026
SA_28G110400.m1	SA_29G067600.m1	0.0539261	0.240246	0.224462
SA_03G282800.m1	SA_06G088800.m1	0.0389418	0.17328	0.224733
SA_05G178900.m1	SA_06G178700.m1	0.0109581	0.048757	0.224748
SA_04G251800.m1	SA_06G117700.m1	0.0442703	0.196725	0.225036
SA_03G232300.m1	SA_05G134300.m1	0.628961	2.79	0.225434
SA_10G309500.m1	SA_11G052100.m1	0.0435738	0.192719	0.226101
SA_12G061400.m1	SA_17G067800.m1	0.231939	1.02507	0.226266
SA_09G087600.m1	SA_10G097000.m1	0.0143631	0.063418	0.226483
SA_02G301500.m1	SA_07G082500.m1	0.0454448	0.200489	0.22667
SA_01G337200.m1	SA_07G051700.m1	0.0495792	0.218099	0.227324
SA_09G418000.m1	SA_11G063600.m1	0.0414008	0.181771	0.227764
SA_05G269000.m1	SA_06G310100.m1	0.0141317	0.0620286	0.227826
SA_22G189600.m1	SA_26G209400.m1	0.0382146	0.167242	0.228499
SA_09G409500.m1	SA_12G038700.m1	0.0547377	0.239508	0.228542
SA_12G061400.m1	SA_14G074500.m1	0.217092	0.948503	0.228879
SA_13G037900.m1	SA_14G032400.m1	0.0168858	0.0731296	0.230903
SA_03G190600.m1	SA_04G192800.m1	0.00948094	0.0409192	0.231699
SA_11G089100.m1	SA_27G189900.m1	0.197711	0.853269	0.231711
SA_02G005400.m1	SA_07G269300.m1	0.054589	0.235493	0.231808
SA_28G182700.m1	SA_29G005900.m1	0.0576913	0.246601	0.233946
SA_07G193400.m1	SA_08G189200.m1	0.012125	0.0518152	0.234004
SA_08G098400.m1	SA_22G077900.m1	0.0350941	0.149915	0.234094
SA_02G227400.m1	SA_19G039300.m1	0.0528132	0.225508	0.234197
SA_21G039200.m1	SA_22G037200.m1	0.0110105	0.0469737	0.234397
SA_09G317300.m1	SA_11G167500.m1	0.0468051	0.197987	0.236405
SA_01G378900.m1	SA_02G358500.m1	0.0141644	0.0598364	0.236719
SA_27G269200.m1	SA_29G006100.m1	0.0473907	0.199368	0.237705
SA_01G003500.m1	SA_07G269300.m1	0.0574545	0.240609	0.238788
SA_11G089100.m1	SA_28G110400.m1	0.219454	0.918691	0.238877
SA_01G337200.m1	SA_02G337800.m1	0.0137458	0.0574225	0.23938
SA_01G370000.m1	SA_22G022900.m1	0.241453	1.00431	0.240417
SA_12G141300.m1	SA_30G130200.m1	0.32946	1.36893	0.24067
SA_28G182400.m1	SA_29G006100.m1	0.0465206	0.192328	0.241881
SA_12G021600.m1	SA_27G189900.m1	0.207993	0.85895	0.242148
SA_12G021600.m1	SA_30G073400.m1	0.221652	0.913513	0.242638
SA_14G202000.m1	SA_17G096500.m1	0.0686509	0.282926	0.242646
SA_23G124900.m1	SA_24G190400.m1	0.027732	0.113603	0.244115
SA_28G110400.m1	SA_30G073400.m1	0.0632782	0.257947	0.245315
SA_12G021600.m1	SA_28G110400.m1	0.226132	0.916642	0.246696
SA_01G310500.m1	SA_02G311500.m1	0.00927996	0.0376136	0.246718
SA_13G111000.m1	SA_14G113900.m1	0.0158428	0.0640349	0.247408
SA_13G199400.m1	SA_18G102500.m1	0.072842	0.293609	0.248092
SA_28G141200.m1	SA_29G043900.m1	0.0517513	0.208511	0.248194
SA_11G301900.m1	SA_12G412400.m1	0.0111049	0.0447042	0.248409
SA_15G268000.m1	SA_16G175500.m1	0.0105252	0.0423551	0.248499
SA_10G289300.m1	SA_12G040500.m1	0.0479533	0.19067	0.2515
SA_01G060800.m1	SA_08G296300.m1	0.0453381	0.180111	0.251722
SA_10G333500.m1	SA_12G087400.m1	0.0482805	0.191414	0.252231
SA_01G003500.m1	SA_08G267100.m1	0.0608143	0.240479	0.252888
SA_13G199400.m1	SA_17G096500.m1	0.0670959	0.264504	0.253667
SA_02G005400.m1	SA_08G267100.m1	0.0598937	0.235389	0.254445
SA_01G332300.m1	SA_02G333100.m1	0.0154899	0.0608589	0.254521
SA_12G141300.m1	SA_29G114000.m1	0.34463	1.34985	0.255309
SA_12G021600.m1	SA_29G067600.m1	0.22644	0.884686	0.255955
SA_05G155600.m1	SA_06G156600.m1	0.0132162	0.0516285	0.255987
SA_09G453200.m1	SA_10G333500.m1	0.0177061	0.0691453	0.256071
SA_11G089100.m1	SA_30G073400.m1	0.217765	0.845785	0.257471
SA_22G077900.m1	SA_31G154900.m1	0.0341127	0.132054	0.258323
SA_08G098400.m1	SA_16G113600.m1	0.0349504	0.135209	0.258492
SA_25G053600.m1	SA_26G049400.m1	0.016195	0.0626115	0.258658
SA_09G428400.m1	SA_11G052700.m1	0.0675877	0.260851	0.259105
SA_14G202000.m1	SA_18G102500.m1	0.0768015	0.293609	0.261577
SA_27G269200.m1	SA_30G008300.m1	0.0424977	0.162328	0.2618
SA_10G309500.m1	SA_12G061400.m1	0.0482677	0.184262	0.261952
SA_04G203900.m1	SA_06G156600.m1	0.0448546	0.171221	0.261968
SA_09G429100.m1	SA_12G061400.m1	0.0514248	0.196093	0.262246
SA_28G182400.m1	SA_30G008300.m1	0.0420878	0.159963	0.26311
SA_11G009500.m1	SA_12G110700.m1	0.0165926	0.0630239	0.263276
SA_07G075400.m1	SA_08G076000.m1	0.00693313	0.0263267	0.263349
SA_01G396000.m1	SA_08G004000.m1	0.0258264	0.0980354	0.263439
SA_29G043900.m1	SA_30G044400.m1	0.0156853	0.0593886	0.264112
SA_28G141200.m1	SA_30G044400.m1	0.0535927	0.202785	0.264284
SA_07G140300.m1	SA_21G115800.m1	0.0536764	0.202486	0.265087
SA_11G089100.m1	SA_29G067600.m1	0.218959	0.825097	0.265374
SA_01G060800.m1	SA_07G239200.m1	0.047956	0.180711	0.265374
SA_01G342500.m1	SA_08G047700.m1	0.0699484	0.262497	0.266473
SA_16G143200.m1	SA_31G015000.m1	0.0435337	0.162634	0.267678
SA_07G047500.m1	SA_08G048100.m1	0.0117996	0.044071	0.26774
SA_21G160700.m1	SA_22G160800.m1	0.0271777	0.10081	0.269593
SA_09G428400.m1	SA_12G060600.m1	0.0682857	0.251844	0.271143
SA_21G024200.m1	SA_26G027900.m1	0.0440168	0.161711	0.272195
SA_05G134300.m1	SA_19G033500.m1	0.164727	0.600769	0.274194
SA_11G027000.m1	SA_12G089400.m1	0.0249063	0.0907908	0.274326
SA_09G453200.m1	SA_12G087400.m1	0.0533239	0.193917	0.274984
SA_15G226400.m1	SA_31G015000.m1	0.0472315	0.171599	0.275243
SA_10G280800.m1	SA_12G032500.m1	0.0473667	0.172005	0.27538
SA_13G122600.m1	SA_18G098200.m1	0.0703386	0.255356	0.275453
SA_09G236900.m1	SA_21G115800.m1	0.0608877	0.220614	0.275992
SA_29G005900.m1	SA_30G008100.m1	0.02134	0.077051	0.27696
SA_22G022900.m1	SA_26G027900.m1	0.0533204	0.192201	0.27742
SA_02G244500.m1	SA_05G134300.m1	0.179729	0.646578	0.277969
SA_01G244400.m1	SA_05G134300.m1	0.181948	0.653484	0.278427
SA_08G170800.m1	SA_16G143200.m1	0.0458475	0.164661	0.278435
SA_05G134300.m1	SA_20G022800.m1	0.169332	0.605789	0.279523
SA_28G089200.m1	SA_30G103900.m1	0.0666559	0.236624	0.281695
SA_16G113600.m1	SA_31G154900.m1	0.0336311	0.118973	0.282679
SA_28G089200.m1	SA_29G092600.m1	0.0743268	0.262903	0.282716
SA_27G269500.m1	SA_30G008100.m1	0.156736	0.551874	0.284008
SA_12G141300.m1	SA_27G130100.m1	0.389102	1.3689	0.284245
SA_15G226400.m1	SA_16G143200.m1	0.022822	0.0801977	0.284571
SA_09G317300.m1	SA_12G194800.m1	0.0680082	0.238657	0.284962
SA_21G074100.m1	SA_31G154900.m1	0.034012	0.119022	0.285762
SA_02G236600.m1	SA_19G008700.m1	0.0961357	0.335981	0.286134
SA_10G297800.m1	SA_12G049100.m1	0.0675121	0.234286	0.288161
SA_10G297800.m1	SA_11G063600.m1	0.0662007	0.229675	0.288237
SA_07G140300.m1	SA_09G236900.m1	0.0219176	0.0759795	0.288467
SA_03G282800.m1	SA_05G088000.m1	0.0462081	0.159874	0.289029
SA_11G128900.m1	SA_29G114000.m1	0.362879	1.25458	0.289243
SA_11G128900.m1	SA_30G130200.m1	0.37064	1.27824	0.289961
SA_07G051700.m1	SA_08G052700.m1	0.0143672	0.049436	0.290623
SA_08G170800.m1	SA_15G226400.m1	0.0519912	0.178087	0.291943
SA_15G170300.m1	SA_16G107800.m1	0.0124438	0.0425066	0.29275
SA_01G040200.m1	SA_07G217900.m1	0.0731472	0.249738	0.292896
SA_05G117700.m1	SA_06G117700.m1	0.0177119	0.0603988	0.29325
SA_01G341300.m1	SA_02G397000.m1	0.0147538	0.0502341	0.2937
SA_08G170800.m1	SA_31G015000.m1	0.0230537	0.0784904	0.293714
SA_11G281900.m1	SA_12G389900.m1	0.0215506	0.0732587	0.294172
SA_13G276100.m1	SA_14G277700.m1	0.0253941	0.0860736	0.295027
SA_07G326700.m1	SA_08G315600.m1	0.0201663	0.0679511	0.296777
SA_16G183500.m1	SA_24G200500.m1	0.11829	0.39839	0.29692
SA_01G244400.m1	SA_03G232300.m1	0.345204	1.16181	0.297126
SA_03G359900.m1	SA_04G278500.m1	0.0315328	0.106095	0.297214
SA_21G118500.m1	SA_22G121400.m1	0.0324562	0.109171	0.297298
SA_14G072800.m1	SA_17G066800.m1	0.0762567	0.256146	0.297709
SA_15G069400.m1	SA_23G060500.m1	0.055513	0.184311	0.301193
SA_15G256100.m1	SA_24G173400.m1	0.25805	0.856757	0.301194
SA_02G320900.m1	SA_08G067700.m1	0.134006	0.444103	0.301746
SA_09G342000.m1	SA_10G215900.m1	0.0345542	0.114479	0.30184
SA_07G097300.m1	SA_09G130000.m1	0.0235376	0.0779477	0.301966
SA_01G040200.m1	SA_02G045300.m1	0.027316	0.0899116	0.303809
SA_05G088000.m1	SA_06G088800.m1	0.0180404	0.0592147	0.304661
SA_23G131200.m1	SA_24G200500.m1	0.0247828	0.0812978	0.30484
SA_13G070000.m1	SA_17G066800.m1	0.075406	0.247075	0.305195
SA_01G174900.m1	SA_19G132500.m1	0.0528006	0.172994	0.305216
SA_14G074500.m1	SA_17G067800.m1	0.0941196	0.307311	0.306268
SA_02G236600.m1	SA_20G011700.m1	0.0903282	0.294918	0.306283
SA_11G128900.m1	SA_27G130100.m1	0.386264	1.26075	0.306375
SA_16G113600.m1	SA_21G074100.m1	0.0145467	0.0474552	0.306536
SA_02G395800.m1	SA_07G047100.m1	0.113136	0.36611	0.309022
SA_13G170000.m1	SA_14G173700.m1	0.018734	0.0605995	0.309144
SA_15G016300.m1	SA_16G012100.m1	0.0159587	0.0514602	0.310117
SA_12G141300.m1	SA_28G061100.m1	0.362869	1.15758	0.313471
SA_27G269500.m1	SA_29G005900.m1	0.143014	0.455131	0.314225
SA_07G249800.m1	SA_08G286800.m1	0.0334217	0.105436	0.316984
SA_27G130100.m1	SA_30G130200.m1	0.100417	0.316249	0.317524
SA_01G174900.m1	SA_20G101700.m1	0.0573611	0.17973	0.319151
SA_16G166400.m1	SA_24G173400.m1	0.26226	0.817594	0.320771
SA_04G151800.m1	SA_05G178900.m1	0.119827	0.37068	0.323262
SA_09G411400.m1	SA_11G071700.m1	0.05916	0.182905	0.323446
SA_08G121400.m1	SA_16G092200.m1	0.0543803	0.167514	0.324631
SA_09G087600.m1	SA_11G229600.m1	0.0845231	0.259862	0.325261
SA_05G233100.m1	SA_06G214500.m1	0.0163212	0.0501356	0.325541
SA_09G411400.m1	SA_12G040500.m1	0.0545755	0.167608	0.325614
SA_02G244500.m1	SA_03G232300.m1	0.343635	1.05392	0.326055
SA_27G205100.m1	SA_28G123400.m1	0.0149284	0.0457478	0.326319
SA_21G148700.m1	SA_25G155000.m1	0.140091	0.427483	0.327711
SA_04G203900.m1	SA_05G155600.m1	0.0512379	0.156099	0.328239
SA_07G047100.m1	SA_08G047700.m1	0.0641802	0.194758	0.329538
SA_15G069400.m1	SA_24G077300.m1	0.0577359	0.174757	0.330379
SA_05G317100.m1	SA_06G261700.m1	0.024267	0.0730705	0.332103
SA_01G396600.m1	SA_07G001500.m1	0.0235126	0.0706534	0.332789
SA_27G130100.m1	SA_29G114000.m1	0.116399	0.349673	0.33288
SA_11G089100.m1	SA_12G021600.m1	0.0266292	0.0795061	0.334933
SA_03G232300.m1	SA_19G033500.m1	0.309021	0.920422	0.335738
SA_07G049500.m1	SA_08G050600.m1	0.0151234	0.0449573	0.336395
SA_02G040800.m1	SA_07G213500.m1	0.106158	0.315136	0.336864
SA_01G349200.m1	SA_02G389700.m1	0.0195201	0.0578707	0.337305
SA_09G236900.m1	SA_22G118700.m1	0.094499	0.27998	0.337521
SA_02G401800.m1	SA_07G001500.m1	0.0306717	0.0905684	0.338658
SA_01G036600.m1	SA_07G213500.m1	0.102065	0.300576	0.339565
SA_04G151800.m1	SA_06G178700.m1	0.128564	0.377656	0.340426
SA_11G128900.m1	SA_28G061100.m1	0.385161	1.11928	0.344117
SA_27G164800.m1	SA_29G092600.m1	0.102226	0.296862	0.344354
SA_09G320600.m1	SA_12G189300.m1	0.0873376	0.250723	0.348344
SA_16G183500.m1	SA_23G131200.m1	0.139627	0.400663	0.348491
SA_13G180200.m1	SA_14G183500.m1	0.0365533	0.104788	0.348831
SA_27G178400.m1	SA_29G105000.m1	0.129401	0.370812	0.348965
SA_09G472000.m1	SA_10G352300.m1	0.0146075	0.0418574	0.348983
SA_22G148600.m1	SA_25G155000.m1	0.14276	0.408649	0.349345
SA_27G164800.m1	SA_30G103900.m1	0.0981749	0.27934	0.351453
SA_29G006100.m1	SA_30G008300.m1	0.021967	0.0624327	0.351851
SA_07G140300.m1	SA_22G118700.m1	0.0982187	0.278356	0.352852
SA_14G183500.m1	SA_18G121400.m1	0.068917	0.194997	0.353426
SA_07G067700.m1	SA_08G067700.m1	0.122186	0.345565	0.353585
SA_07G097300.m1	SA_22G064400.m1	0.120257	0.33813	0.355653
SA_02G174100.m1	SA_19G132500.m1	0.0708165	0.198297	0.357124
SA_27G229600.m1	SA_29G029300.m1	0.0836938	0.233401	0.358584
SA_09G130000.m1	SA_22G064400.m1	0.117644	0.326519	0.360297
SA_01G064600.m1	SA_02G068300.m1	0.0246082	0.0682958	0.360318
SA_11G071700.m1	SA_12G040500.m1	0.0332122	0.0921222	0.360523
SA_27G189900.m1	SA_28G110400.m1	0.0413939	0.11481	0.360541
SA_05G297300.m1	SA_06G281500.m1	0.0179701	0.0497258	0.361383
SA_07G239200.m1	SA_08G296300.m1	0.0183901	0.0508631	0.361561
SA_09G411400.m1	SA_10G289300.m1	0.0288929	0.0796865	0.362582
SA_10G097000.m1	SA_11G229600.m1	0.108089	0.298015	0.362695
SA_05G314800.m1	SA_14G243900.m1	0.0705739	0.19456	0.362736
SA_27G251800.m1	SA_28G166000.m1	0.0276281	0.0760144	0.363458
SA_11G167500.m1	SA_12G194800.m1	0.0310155	0.0848605	0.365488
SA_11G052100.m1	SA_12G061400.m1	0.0221925	0.0606446	0.365943
SA_03G232300.m1	SA_20G022800.m1	0.307016	0.838904	0.365973
SA_13G000300.m1	SA_14G072800.m1	0.0522459	0.142668	0.366205
SA_13G122600.m1	SA_17G092300.m1	0.095368	0.256924	0.371191
SA_09G130000.m1	SA_21G060100.m1	0.13522	0.363593	0.371898
SA_03G055200.m1	SA_05G208500.m1	0.0960566	0.257855	0.372522
SA_06G345400.m1	SA_14G277700.m1	0.121668	0.326442	0.372709
SA_29G092600.m1	SA_30G103900.m1	0.0292567	0.0781739	0.374252
SA_13G086200.m1	SA_14G089600.m1	0.0252439	0.0671001	0.376212
SA_01G319500.m1	SA_07G067700.m1	0.092463	0.244652	0.377937
SA_09G429100.m1	SA_10G309500.m1	0.0236559	0.0620593	0.381183
SA_02G174100.m1	SA_20G101700.m1	0.0774017	0.20258	0.38208
SA_05G090100.m1	SA_06G090600.m1	0.0211679	0.0553039	0.382756
SA_07G097300.m1	SA_21G060100.m1	0.14025	0.365665	0.383547
SA_29G041200.m1	SA_30G041600.m1	0.0349973	0.0905666	0.386426
SA_01G032700.m1	SA_02G036700.m1	0.0354753	0.0916992	0.386866
SA_27G229600.m1	SA_30G030700.m1	0.0923908	0.236293	0.391
SA_07G269300.m1	SA_08G267100.m1	0.0262499	0.0671006	0.391202
SA_01G396000.m1	SA_02G401200.m1	0.0312785	0.0795664	0.393113
SA_05G314800.m1	SA_13G243600.m1	0.0680335	0.172758	0.393808
SA_13G146500.m1	SA_14G149400.m1	0.0247302	0.0626049	0.395021
SA_03G055200.m1	SA_06G238800.m1	0.0916418	0.231721	0.395484
SA_04G323900.m1	SA_05G050800.m1	0.0665593	0.167426	0.397546
SA_03G095300.m1	SA_05G232300.m1	0.110988	0.278911	0.397932
SA_05G342200.m1	SA_14G277700.m1	0.135032	0.339134	0.398166
SA_15G182400.m1	SA_31G154900.m1	0.0731702	0.183313	0.399154
SA_01G396000.m1	SA_07G002600.m1	0.0324814	0.0812289	0.399875
SA_11G167700.m1	SA_12G194900.m1	0.0165383	0.0413165	0.400284
SA_11G006900.m1	SA_12G010300.m1	0.0353144	0.0881587	0.400578
SA_01G227100.m1	SA_02G227400.m1	0.0345064	0.0859492	0.401474
SA_05G208500.m1	SA_06G238800.m1	0.0335178	0.0834318	0.401739
SA_07G082500.m1	SA_08G083800.m1	0.0223412	0.0555976	0.401838
SA_01G003500.m1	SA_02G005400.m1	0.0269827	0.0664307	0.406178
SA_02G401200.m1	SA_08G004000.m1	0.045233	0.110852	0.40805
SA_29G054700.m1	SA_30G056800.m1	0.0204005	0.0499473	0.40844
SA_07G097300.m1	SA_08G123500.m1	0.350778	0.858229	0.408723
SA_13G180200.m1	SA_18G121400.m1	0.12808	0.313208	0.408928
SA_01G319500.m1	SA_08G067700.m1	0.171543	0.416436	0.41193
SA_01G244400.m1	SA_06G134200.m1	0.272463	0.661248	0.412044
SA_27G245900.m1	SA_28G141200.m1	0.0365536	0.0884003	0.4135
SA_09G409500.m1	SA_10G286900.m1	0.0603003	0.145537	0.41433
SA_05G286300.m1	SA_06G291600.m1	0.0641524	0.154619	0.414907
SA_09G418000.m1	SA_10G297800.m1	0.0627062	0.150608	0.416353
SA_19G008700.m1	SA_20G011700.m1	0.0417002	0.0998124	0.417786
SA_05G342200.m1	SA_13G276100.m1	0.135927	0.325271	0.417888
SA_19G101900.m1	SA_20G085200.m1	0.0291839	0.0694659	0.420119
SA_17G169100.m1	SA_18G173700.m1	0.0169237	0.0402781	0.42017
SA_07G097300.m1	SA_31G131400.m1	0.331186	0.787038	0.420801
SA_03G252600.m1	SA_04G251800.m1	0.0224487	0.0533184	0.421031
SA_03G095300.m1	SA_06G215600.m1	0.112922	0.266911	0.42307
SA_09G130000.m1	SA_31G131400.m1	0.324306	0.762198	0.425488
SA_08G123500.m1	SA_09G130000.m1	0.359051	0.841051	0.426908
SA_28G061100.m1	SA_30G130200.m1	0.0757161	0.176325	0.429412
SA_08G123500.m1	SA_31G131400.m1	0.0277451	0.0642737	0.431672
SA_01G396600.m1	SA_02G401800.m1	0.0178814	0.0411892	0.434129
SA_23G123100.m1	SA_24G193300.m1	0.0123512	0.0282145	0.437761
SA_06G345400.m1	SA_13G276100.m1	0.122823	0.280451	0.437948
SA_06G134200.m1	SA_19G033500.m1	0.293407	0.666884	0.439968
SA_21G044400.m1	SA_22G048200.m1	0.0517147	0.117286	0.440929
SA_11G028600.m1	SA_12G087400.m1	0.0301016	0.0679827	0.442783
SA_02G401200.m1	SA_07G002600.m1	0.048915	0.110308	0.44344
SA_08G123500.m1	SA_21G060100.m1	0.40283	0.905119	0.445058
SA_01G002600.m1	SA_02G003800.m1	0.236741	0.531699	0.445253
SA_10G185600.m1	SA_12G189300.m1	0.231731	0.519225	0.446301
SA_12G070600.m1	SA_13G011700.m1	0.37806	0.843966	0.447956
SA_29G029300.m1	SA_30G030700.m1	0.047388	0.105504	0.44916
SA_28G155600.m1	SA_30G030700.m1	0.0700175	0.155872	0.449199
SA_27G211600.m1	SA_30G055400.m1	0.125652	0.279685	0.449262
SA_27G211600.m1	SA_29G053700.m1	0.126209	0.280732	0.449572
SA_19G132500.m1	SA_20G101700.m1	0.0206551	0.045911	0.449893
SA_28G061100.m1	SA_29G114000.m1	0.0876098	0.193276	0.453289
SA_03G201300.m1	SA_06G156600.m1	0.139029	0.306295	0.453905
SA_01G342500.m1	SA_02G395800.m1	0.044499	0.0979973	0.454084
SA_05G011400.m1	SA_06G014100.m1	0.0359404	0.0786614	0.4569
SA_01G342500.m1	SA_07G047100.m1	0.169225	0.369926	0.457455
SA_27G269500.m1	SA_28G182700.m1	0.118301	0.258506	0.457635
SA_02G003800.m1	SA_08G316000.m1	0.114673	0.250042	0.458616
SA_23G122700.m1	SA_24G194000.m1	0.076692	0.166866	0.459603
SA_27G229600.m1	SA_28G155600.m1	0.0321903	0.0688381	0.467623
SA_06G134200.m1	SA_20G022800.m1	0.297844	0.634843	0.469162
SA_27G269200.m1	SA_28G182400.m1	0.0169369	0.0359584	0.471013
SA_27G130100.m1	SA_28G061100.m1	0.0415858	0.0881735	0.471636
SA_27G164800.m1	SA_28G089200.m1	0.0611707	0.126883	0.482103
SA_22G064400.m1	SA_31G131400.m1	0.358845	0.740094	0.484864
SA_01G319500.m1	SA_02G320900.m1	0.0406622	0.0815718	0.498483
SA_21G115800.m1	SA_22G118700.m1	0.0675751	0.134098	0.503923
SA_08G123500.m1	SA_22G064400.m1	0.382598	0.750767	0.50961
SA_15G182400.m1	SA_21G074100.m1	0.0631576	0.123876	0.509844
SA_03G232300.m1	SA_06G134200.m1	0.504658	0.988938	0.510303
SA_01G174900.m1	SA_02G174100.m1	0.0343926	0.0673074	0.510979
SA_17G096500.m1	SA_18G102500.m1	0.191113	0.372263	0.51338
SA_08G098400.m1	SA_15G182400.m1	0.0843924	0.162798	0.518386
SA_07G002600.m1	SA_08G004000.m1	0.0233858	0.0449212	0.520596
SA_13G011700.m1	SA_14G060700.m1	0.0514702	0.0986258	0.521874
SA_29G067600.m1	SA_30G073400.m1	0.031828	0.0606202	0.52504
SA_02G244500.m1	SA_06G134200.m1	0.336154	0.639784	0.525418
SA_01G036600.m1	SA_02G040800.m1	0.0481833	0.0914223	0.527041
SA_10G289300.m1	SA_11G071700.m1	0.236132	0.446553	0.528788
SA_03G027200.m1	SA_06G323600.m1	0.361698	0.683847	0.528916
SA_07G114500.m1	SA_09G157700.m1	0.0151037	0.0284095	0.531643
SA_25G155000.m1	SA_26G139300.m1	0.136811	0.256035	0.534346
SA_03G027200.m1	SA_05G254700.m1	0.340801	0.631854	0.539368
SA_01G296700.m1	SA_21G109800.m1	0.402035	0.743865	0.540468
SA_05G186500.m1	SA_06G187500.m1	0.0587073	0.10814	0.54288
SA_21G024200.m1	SA_22G022900.m1	0.0298504	0.0549202	0.543523
SA_10G144200.m1	SA_12G242100.m1	0.272661	0.49846	0.547008
SA_09G320600.m1	SA_10G185600.m1	0.120327	0.216632	0.555444
SA_11G128900.m1	SA_12G141300.m1	0.036066	0.0647401	0.557089
SA_01G002600.m1	SA_08G316000.m1	0.276533	0.49505	0.558596
SA_09G428400.m1	SA_10G308600.m1	0.047617	0.085026	0.560028
SA_13G086200.m1	SA_18G068600.m1	0.0871077	0.153428	0.567743
SA_25G033600.m1	SA_26G003600.m1	0.0851543	0.149071	0.571234
SA_29G053700.m1	SA_30G055400.m1	0.0289489	0.0506611	0.571424
SA_17G066800.m1	SA_18G057000.m1	0.0465594	0.0811469	0.573767
SA_14G089600.m1	SA_18G068600.m1	0.094524	0.161646	0.58476
SA_15G029800.m1	SA_16G024300.m1	0.416565	0.696862	0.597773
SA_01G296700.m1	SA_22G113200.m1	0.436425	0.716887	0.608778
SA_29G114000.m1	SA_30G130200.m1	0.0328106	0.0532399	0.616278
SA_21G060100.m1	SA_22G064400.m1	0.133937	0.215635	0.621131
SA_09G365000.m1	SA_10G245100.m1	0.165591	0.265909	0.622736
SA_17G116700.m1	SA_18G121400.m1	0.12476	0.198544	0.628373
SA_27G211600.m1	SA_28G130600.m1	0.0924545	0.14568	0.634641
SA_27G083700.m1	SA_28G033200.m1	0.03405	0.053341	0.638345
SA_27G075800.m1	SA_28G028700.m1	0.0448918	0.0701163	0.640248
SA_21G109800.m1	SA_22G113200.m1	0.139906	0.21477	0.651425
SA_15G182400.m1	SA_22G077900.m1	0.060567	0.0924245	0.655314
SA_03G201300.m1	SA_05G155600.m1	0.203365	0.308231	0.65978
SA_05G342200.m1	SA_06G345400.m1	0.220691	0.33158	0.665573
SA_05G291000.m1	SA_06G287200.m1	0.0544964	0.0817298	0.666788
SA_09G005400.m1	SA_10G003900.m1	0.0505392	0.0721831	0.700152
SA_11G043700.m1	SA_12G070600.m1	0.20412	0.290515	0.702614
SA_17G124800.m1	SA_18G128800.m1	0.0402183	0.0552241	0.728275
SA_15G239800.m1	SA_16G153600.m1	0.0989995	0.134494	0.736088
SA_03G095300.m1	SA_04G104900.m1	0.136247	0.184895	0.73689
SA_13G260200.m1	SA_14G260300.m1	0.00513965	0.00652533	0.787646
SA_15G182400.m1	SA_16G113600.m1	0.0557018	0.0689307	0.808085
SA_13G131600.m1	SA_14G136200.m1	0.0658672	0.0785253	0.838802
SA_17G014000.m1	SA_18G013600.m1	0.00287954	0.0032415	0.888338
SA_05G134300.m1	SA_06G134200.m1	0.290283	0.326126	0.890094
SA_09G428400.m1	SA_15G029800.m1	0.532416	NaN	NaN
SA_10G308600.m1	SA_15G029800.m1	0.506347	NaN	NaN
SA_12G060600.m1	SA_15G029800.m1	0.509754	NaN	NaN
SA_17G023500.m1	SA_18G022800.m1	0.00379748	0	0
		0.0757046	0.291781	0.273495

## Sheet: Table S4
Table S4. Expression patterns of SaWD40 genes in different tissues using RNA-seq data
Gene name	Gene ID	roots	stems	seeding leaves	flag leaves	development inflorescences	maturing seeds	mature seeds
SaWD40-194	SA_06G014100	5.93738	0	0	0	0	0	0
SaWD40-253	SA_07G049200	0	0	0	0.878711	0.160891	0	0
SaWD40-487	SA_09G216100	0	0.665468	0.88999	0.870163	0.14822	0	0.345002
SaWD40-283	SA_30G103900	0	0	0.880741	0.837657	0.664551	1.41614	0
SaWD40-437	SA_25G177300	0	0.107965	0.63097	0.772616	2.11059	0.897648	5.16445
SaWD40-343	SA_07G083100	0	0	0.610604	0.770654	9.6602	2.60569	15.6745
SaWD40-478	SA_02G003800	0	0.572242	0.587746	0.740317	4.74882	1.34628	1.06761
SaWD40-86	SA_07G275600	0	0	0.632336	0.707818	0	0	0.645624
SaWD40-394	SA_18G009000	0.376864	0.157872	0.354018	0.659227	0.926876	0.217334	1.27444
SaWD40-457	SA_17G081900	0	0	0.225787	0.628607	0.105601	0	0.042903
SaWD40-302	SA_10G144200	0	0	0.449847	0.600681	0.207634	0	0.37951
SaWD40-273	SA_26G224800	0	0	0	0.588301	2.55239	1.65726	2.33916
SaWD40-464	SA_09G130000	0	0	0	0.40479	0.042149	0	0.697932
SaWD40-495	SA_14G136200	0	0.441466	0.059547	0.363338	0.860392	0	2.39716
SaWD40-252	SA_04G048700	0	0.775846	0.637779	0.344889	0.108749	1.54835	0.437154
SaWD40-345	SA_12G049100	147.849	0.285714	4.76345	2.95893	11.3087	7.28265	24.7118
SaWD40-271	SA_11G063600	121.388	0	2.05699	1.62937	6.59862	1.8181	9.99318
SaWD40-522	SA_01G244400	101.857	24.9925	27.8486	15.3646	29.6782	52.2226	43.4913
SaWD40-479	SA_02G244500	100.694	31.9945	33.0624	17.2412	50.2856	68.3717	68.3443
SaWD40-466	SA_19G033500	85.7059	30.4981	29.4497	16.3574	45.6329	94.26	62.4714
SaWD40-27	SA_01G187400	70.2882	26.5746	16.5301	12.785	28.4894	104.516	22.2828
SaWD40-556	SA_09G318000	69.5165	22.6933	22.6838	22.6867	25.2877	55.5346	28.1703
SaWD40-176	SA_05G327900	58.9942	23.985	20.3533	10.6945	14.2531	12.4395	17.3883
SaWD40-212	SA_20G022800	57.5197	22.3958	30.3824	22.7532	44.0616	60.8991	70.8656
SaWD40-569	SA_26G049400	50.0774	46.5367	14.2911	14.0465	35.4328	35.7254	32.9251
SaWD40-61	SA_25G137400	48.8574	7.52541	4.2843	4.34006	11.5821	25.3284	7.50494
SaWD40-534	SA_25G053600	43.3966	19.2664	9.96581	7.9052	13.1554	12.3892	20.0267
SaWD40-546	SA_13G227500	40.9652	27.8819	14.6552	11.8819	66.2204	42.6447	38.9457
SaWD40-564	SA_12G089400	40.81	3.60131	13.4377	6.40412	16.942	8.02105	6.8027
SaWD40-576	SA_05G254700	39.5949	5.89262	5.15263	3.65703	12.0632	4.25532	7.11095
SaWD40-17	SA_23G106900	37.2761	17.4804	14.1257	12.9196	15.9445	18.2729	12.3263
SaWD40-445	SA_02G185600	35.6726	20.5971	14.9005	14.0205	21.6635	135.645	26.4304
SaWD40-362	SA_06G124800	35.4149	23.2442	19.4288	24.0794	21.2207	18.9836	22.3823
SaWD40-385	SA_27G269300	35.2951	2.00371	5.49118	4.40055	9.15414	33.9285	5.05088
SaWD40-451	SA_05G125100	33.354	25.8585	27.2478	36.9882	25.8359	19.6216	37.1548
SaWD40-55	SA_07G049500	33.1277	2.41782	5.63596	7.35237	14.5355	10.3657	9.09884
SaWD40-4	SA_01G301100	32.9504	21.4889	20.8849	27.319	26.2769	47.1794	35.2337
SaWD40-42	SA_04G245100	30.9032	25.4489	19.8757	23.7833	25.1611	28.9769	45.5618
SaWD40-157	SA_10G037300	30.8368	27.1865	9.06866	9.24289	14.1691	16.4694	22.2449
SaWD40-106	SA_03G246200	28.8714	31.4526	19.6774	25.5447	28.232	61.8026	65.8601
SaWD40-548	SA_28G166000	28.1029	12.7675	10.2317	9.94292	9.71383	25.0339	23.8665
SaWD40-228	SA_08G177300	27.0369	14.4166	15.3687	13.3939	17.3378	41.7073	21.4481
SaWD40-511	SA_07G018800	26.9989	2.15421	7.61762	6.73962	8.04287	26.936	10.5759
SaWD40-458	SA_01G337200	25.6062	4.2703	7.03134	3.80908	6.77708	7.69493	9.84913
SaWD40-275	SA_01G090500	25.582	10.4876	27.316	19.5797	15.0781	25.7864	19.7441
SaWD40-509	SA_01G301500	25.3948	1.21898	2.48413	3.17503	3.87731	7.18112	2.66046
SaWD40-45	SA_17G116700	25.2638	10.6994	9.15814	7.39412	11.2628	1.34299	19.7101
SaWD40-135	SA_05G171100	25.1929	9.07919	9.72685	9.34538	11.6413	21.1733	8.4811
SaWD40-521	SA_11G166700	24.6266	16.5675	15.5439	18.8607	12.3048	28.5517	13.3097
SaWD40-512	SA_09G236900	24.215	5.02364	7.26203	7.63505	8.2691	29.8194	11.8327
SaWD40-471	SA_04G192800	23.6099	7.21166	4.65318	4.96988	9.84117	6.63181	7.8183
SaWD40-91	SA_02G094300	23.3473	13.9987	32.2026	26.2701	13.0972	14.5897	26.1669
SaWD40-156	SA_06G117700	22.9978	3.03398	19.7291	2.78676	4.89966	1.62571	1.59808
SaWD40-566	SA_06G274600	22.8226	17.0071	12.3834	10.3233	19.6658	43.1913	21.8359
SaWD40-136	SA_02G301500	21.9445	0.769892	1.82556	2.54345	3.70448	14.2319	1.47441
SaWD40-480	SA_28G033200	21.28	8.30157	5.61015	6.73375	7.75815	14.848	9.22438
SaWD40-89	SA_15G120300	21.2778	9.95669	6.51715	8.14582	11.8946	4.41317	10.9858
SaWD40-536	SA_30G041600	20.9699	1.25479	8.8537	9.60581	9.13714	6.99487	6.39772
SaWD40-467	SA_06G261700	20.5959	5.96549	11.9639	10.178	9.63388	7.67591	6.58438
SaWD40-553	SA_07G209300	20.4774	2.21898	3.71598	5.14731	9.38463	24.6476	8.65521
SaWD40-549	SA_13G260200	19.9728	0	2.38652	3.72193	7.13224	11.6644	9.37844
SaWD40-329	SA_07G313000	19.7922	8.30641	27.8024	19.3192	27.4294	94.0129	30.3596
SaWD40-143	SA_09G342000	19.5472	0.724236	3.86009	3.15151	4.52866	9.68002	6.17953
SaWD40-299	SA_15G260900	19.4237	14.4344	5.52244	7.43691	9.27045	22.6521	20.2456
SaWD40-58	SA_07G082500	19.3174	3.46335	3.92404	3.52822	3.50628	6.81201	2.59326
SaWD40-452	SA_07G193400	18.8052	4.89803	7.50992	6.96956	6.20514	7.74787	6.48872
SaWD40-114	SA_02G068300	18.6802	4.09871	4.81726	6.25689	7.56879	10.5252	7.65212
SaWD40-446	SA_14G226800	18.6019	6.65194	1.46404	1.92972	5.2908	6.98409	4.03383
SaWD40-15	SA_07G056300	18.1993	3.76481	2.96748	4.96015	8.43487	11.443	16.7599
SaWD40-215	SA_25G024100	18.1791	5.82965	11.3739	9.73536	8.82291	10.7566	13.122
SaWD40-110	SA_14G173700	17.9441	2.0214	4.337	5.11105	9.7039	6.60381	6.34674
SaWD40-180	SA_01G247500	17.719	6.24937	7.49493	7.16855	8.31277	9.86501	14.6855
SaWD40-23	SA_11G138300	17.4353	4.06478	4.80071	2.63853	6.15881	22.3781	8.81192
SaWD40-177	SA_24G179000	16.886	7.01464	9.64509	12.9373	18.5445	15.2092	9.84663
SaWD40-178	SA_01G227100	16.607	1.80903	6.26101	5.36146	4.78347	9.15207	6.99838
SaWD40-60	SA_05G009300	16.4964	3.547	6.65481	5.13254	5.38206	12.6587	6.41195
SaWD40-26	SA_11G073500	16.4959	13.4914	10.0743	11.7862	18.8775	33.2278	14.8475
SaWD40-213	SA_22G148600	15.9579	0.71904	4.36242	2.84417	4.58377	3.25352	5.17798
SaWD40-155	SA_10G286900	15.8342	14.3244	5.90188	4.93711	11.2454	40.3715	9.67221
SaWD40-137	SA_08G050600	15.7611	2.05398	2.46213	5.54809	9.39113	8.10395	4.39504
SaWD40-25	SA_12G010300	15.7098	5.1142	2.88941	3.33024	4.34234	12.8282	5.00202
SaWD40-363	SA_12G389100	15.6497	15.2151	7.97711	6.60184	9.38965	11.978	11.9298
SaWD40-221	SA_06G323600	15.3615	7.78543	5.13314	5.24119	14.8156	4.43671	7.58718
SaWD40-579	SA_12G061400	15.3552	3.8335	9.38467	6.73184	5.11872	7.19146	9.38057
SaWD40-577	SA_06G248300	15.3413	19.4678	14.4789	17.5541	20.6567	27.936	30.1116
SaWD40-238	SA_07G051700	15.1826	4.65261	4.67686	3.45076	3.46354	5.81256	6.04033
SaWD40-309	SA_31G015000	15.1136	9.59598	5.186	3.2676	12.1091	34.0635	21.5647
SaWD40-140	SA_28G182500	15.0686	5.90415	10.3494	7.02289	13.7828	45.5411	24.0855
SaWD40-338	SA_07G113700	14.5586	2.58462	6.36716	1.96515	2.09242	26.1444	6.63651
SaWD40-366	SA_05G319000	14.4103	11.0718	7.21202	9.70247	12.4708	29.7431	14.5302
SaWD40-264	SA_08G189300	14.3149	4.1165	3.66913	1.19925	8.8978	7.89534	4.1608
SaWD40-223	SA_06G259000	13.8465	7.67326	7.78069	7.78602	11.3121	27.902	10.2552
SaWD40-7	SA_14G228500	13.8464	18.4825	7.16536	7.93627	32.3745	58.4602	31.5702
SaWD40-413	SA_05G117700	13.7441	1.55867	15.3231	3.98752	3.70775	1.46551	5.95426
SaWD40-344	SA_08G019400	13.6125	4.32415	8.59676	9.92317	11.3123	18.4419	12.2281
SaWD40-382	SA_02G040800	13.5851	1.65455	2.90645	4.78614	4.45287	7.03137	14.284
SaWD40-434	SA_14G274500	13.5719	3.92212	5.72189	4.3543	4.27262	24.1232	7.25032
SaWD40-387	SA_30G219500	13.5621	20.5138	18.0464	26.3932	17.2047	38.344	24.405
SaWD40-422	SA_26G209400	13.3474	9.64742	11.3997	8.45545	8.60119	8.81623	12.1876
SaWD40-266	SA_07G002600	13.2425	3.76539	1.07852	3.63657	6.42058	47.834	14.7739
SaWD40-128	SA_05G297300	13.2019	20.5633	16.9334	17.4885	10.5765	32.6335	10.9299
SaWD40-518	SA_14G246000	13.1718	2.29127	3.98871	5.92028	2.98234	4.18575	3.81657
SaWD40-506	SA_16G169500	13.0575	15.7716	8.15425	8.91092	12.1121	20.4053	16.5336
SaWD40-163	SA_24G005100	12.9279	8.34629	17.3202	14.1671	8.87704	14.7597	15.645
SaWD40-483	SA_25G207900	12.6083	4.18582	3.02356	1.35508	5.92808	9.71923	4.99295
SaWD40-497	SA_26G050300	12.5109	4.3352	2.38666	6.24224	6.58485	6.18995	6.33413
SaWD40-8	SA_05G090100	12.4465	3.46842	5.26263	2.64191	3.33076	5.47668	2.21113
SaWD40-463	SA_08G062000	12.4345	7.0979	4.94732	4.95602	5.15145	14.9562	10.9099
SaWD40-195	SA_14G221100	12.3536	6.5168	9.99695	8.12005	7.78898	11.0662	9.49745
SaWD40-226	SA_01G064600	12.3476	1.42971	9.00083	7.5977	9.09863	4.76133	11.277
SaWD40-46	SA_26G007000	12.3446	6.46324	6.77416	5.0205	9.07935	8.2201	12.8722
SaWD40-234	SA_25G216000	12.3397	15.1664	13.4444	12.4289	10.9884	8.93663	20.3555
SaWD40-118	SA_21G115800	12.3036	1.71202	3.9549	4.85274	5.05207	20.4173	4.46911
SaWD40-11	SA_27G178400	11.9194	2.75824	2.30987	2.05649	3.68953	0.497716	3.34452
SaWD40-535	SA_26G139300	11.8029	14.122	7.0165	7.11907	12.5099	39.9768	12.2835
SaWD40-49	SA_02G337800	11.8009	3.03257	6.27138	6.35428	6.29391	6.77431	11.0963
SaWD40-539	SA_29G043900	11.7474	3.71078	9.3904	6.71216	6.10746	3.37344	4.8818
SaWD40-169	SA_08G189200	11.7312	10.5079	12.0215	6.91164	8.25225	10.2086	5.33503
SaWD40-207	SA_08G004000	11.447	14.7925	6.42307	8.14996	8.9321	30.9892	13.7865
SaWD40-476	SA_23G123100	11.4038	6.3241	10.9943	7.17875	8.54541	4.28472	10.6978
SaWD40-551	SA_10G183600	11.4002	9.4703	15.4937	12.2691	11.6293	32.3585	13.9906
SaWD40-126	SA_16G175500	11.1668	12.0576	10.9604	10.5615	10.0174	9.90532	10.1486
SaWD40-418	SA_11G052700	11.003	17.4836	9.59186	14.115	14.342	13.8031	18.7337
SaWD40-190	SA_12G110700	10.9683	8.39974	6.55986	3.38975	8.76522	9.92539	5.72067
SaWD40-153	SA_11G009500	10.9677	55.3055	16.9319	12.595	26.9695	14.2102	15.0893
SaWD40-530	SA_13G199400	10.9636	1.90293	2.96689	4.45214	4.44056	5.23881	5.79567
SaWD40-403	SA_02G327300	10.8739	7.56596	4.78234	4.31151	7.16096	7.85217	10.6041
SaWD40-270	SA_20G034800	10.8452	0.681382	2.38878	2.01324	3.31307	4.9309	2.37155
SaWD40-559	SA_21G148700	10.3901	1.31304	2.19615	2.13509	3.60729	4.4102	3.15791
SaWD40-503	SA_07G062500	10.3746	6.85666	9.26094	6.49643	4.79549	3.48538	5.94058
SaWD40-292	SA_01G018800	10.3675	1.79345	3.46202	3.8323	3.88521	8.54857	7.75326
SaWD40-570	SA_21G039200	10.3573	7.46341	2.12888	5.11111	8.48231	12.3789	10.6352
SaWD40-557	SA_25G193700	10.3422	9.6483	15.9098	14.7615	10.9443	4.28843	14.1392
SaWD40-572	SA_21G024200	10.3276	5.61489	13.1171	8.67634	8.27453	26.01	6.55072
SaWD40-51	SA_21G118500	10.2802	2.06841	4.94009	2.9641	6.63342	10.8806	11.738
SaWD40-304	SA_27G245900	10.0648	0.384892	1.97845	3.14305	2.5549	5.78637	2.80819
SaWD40-248	SA_08G052700	10.0371	3.85364	5.99445	3.79783	4.64842	5.98069	3.5018
SaWD40-320	SA_24G200500	9.94688	0	0	0	3.44552	2.54409	2.65237
SaWD40-63	SA_11G006900	9.94634	5.79058	2.98089	3.39513	4.42284	9.55533	3.95104
SaWD40-543	SA_05G232300	9.8894	3.04927	6.41904	4.64861	7.57977	11.0247	4.69187
SaWD40-173	SA_23G028200	9.85817	23.0932	13.2582	15.6655	17.8957	25.6604	21.1054
SaWD40-14	SA_11G089100	9.75837	13.4253	2.60013	3.3218	3.75094	4.3502	4.7812
SaWD40-492	SA_02G023000	9.75	1.20057	3.41117	3.11072	4.98094	11.1666	7.50955
SaWD40-77	SA_10G308600	9.74581	19.673	27.8463	48.7835	27.7267	14.1946	21.6449
SaWD40-227	SA_14G202000	9.69379	0.900974	1.36458	2.02482	4.71871	13.9364	4.27566
SaWD40-537	SA_29G005900	9.50689	1.20088	0.083996	0	2.73007	2.74762	2.06013
SaWD40-191	SA_22G037200	9.37554	6.45992	4.28705	4.82674	7.09699	9.49734	11.7418
SaWD40-183	SA_11G281900	9.37526	3.02072	3.14882	5.28034	3.32116	6.49511	6.1311
SaWD40-5	SA_06G012000	9.2969	6.71706	16.3382	10.8448	5.54421	11.8534	6.85915
SaWD40-285	SA_02G301000	9.19529	34.6517	21.12	28.1834	35.0086	70.4657	73.1377
SaWD40-254	SA_12G389900	9.17272	2.91691	1.57824	3.2273	4.3925	5.01705	6.98424
SaWD40-313	SA_09G133400	9.14236	8.11981	6.38585	7.13245	11.2876	14.8832	10.2254
SaWD40-198	SA_09G039700	8.90365	29.875	13.1725	11.5348	17.2466	13.1591	23.3059
SaWD40-53	SA_02G401200	8.90338	10.8342	3.74914	4.07727	2.18174	20.8678	12.964
SaWD40-438	SA_05G303600	8.85473	26.3584	6.54032	9.76797	25.6897	82.1933	33.7559
SaWD40-525	SA_29G041200	8.85441	0	2.85945	3.08783	6.54915	2.24466	6.67895
SaWD40-165	SA_06G310100	8.76167	8.02057	22.1658	8.45859	11.0093	3.45146	16.2797
SaWD40-298	SA_01G349200	8.73741	0	0	0	0.915732	0.201606	0.504105
SaWD40-241	SA_25G054200	8.71097	8.68909	0.757665	4.56817	4.2447	12.6027	4.78772
SaWD40-204	SA_24G077300	8.64841	6.19446	9.53538	15.5219	9.23595	3.12615	17.1101
SaWD40-249	SA_03G190600	8.55075	1.31926	2.2031	2.50443	6.5224	2.80359	5.66378
SaWD40-303	SA_15G170300	8.4792	8.02582	7.11946	4.19986	8.66254	14.766	7.83726
SaWD40-384	SA_03G240900	8.44327	3.28429	4.83289	3.65648	3.09336	5.35444	6.77053
SaWD40-352	SA_17G014000	8.33867	7.87386	6.06094	4.51598	6.95095	8.86921	9.62933
SaWD40-261	SA_29G147300	8.33543	10.8814	14.6147	17.2252	13.789	25.4965	13.9324
SaWD40-550	SA_05G286300	8.23941	1.65504	6.44712	5.80307	7.90168	2.85071	5.36886
SaWD40-373	SA_11G280500	8.11125	11.9864	7.36116	7.25764	8.26132	11.693	9.33135
SaWD40-532	SA_12G142900	8.09334	12.4793	7.47499	7.09703	11.3952	14.7386	9.65717
SaWD40-545	SA_08G067700	8.09125	0	0	0	1.13639	0	0.285907
SaWD40-2	SA_02G311500	8.0815	8.695	6.85995	8.55731	8.96386	7.55451	7.10971
SaWD40-38	SA_03G359900	7.98477	3.0449	1.65653	2.3257	5.10549	5.38754	2.36663
SaWD40-573	SA_03G065900	7.86865	7.35153	5.11992	13.3318	15.9007	10.6815	19.2608
SaWD40-113	SA_14G089600	7.59183	6.272	17.7038	19.8288	17.1063	9.40426	29.4278
SaWD40-361	SA_08G202300	7.47468	1.47418	1.25047	1.18199	5.15337	4.29174	4.14714
SaWD40-40	SA_10G349400	7.44414	3.4268	2.21227	1.97041	6.2375	11.2571	6.67386
SaWD40-122	SA_16G107800	7.43879	6.82431	5.41097	7.11686	8.93246	20.0269	8.97553
SaWD40-288	SA_11G027000	7.2429	3.93873	7.797	6.03502	8.86353	14.5363	10.1986
SaWD40-233	SA_08G168100	7.14143	34.3925	19.4369	22.336	17.8274	40.3698	22.7421
SaWD40-358	SA_05G214900	7.123	13.6513	5.95364	6.02006	5.91533	3.32879	8.64252
SaWD40-552	SA_01G036600	7.09364	5.76991	6.22137	5.37081	3.87651	5.78952	9.19094
SaWD40-380	SA_09G157700	7.09221	3.32076	4.25432	4.55926	5.02608	2.78009	7.64402
SaWD40-158	SA_23G124900	7.02938	8.79498	12.9288	14.596	14.2301	7.84259	11.0691
SaWD40-101	SA_30G044400	7.02065	1.77854	4.0751	4.72806	3.33348	5.92487	4.71065
SaWD40-565	SA_13G246000	7.0055	6.77398	6.60111	6.1795	3.57787	2.80203	5.51928
SaWD40-154	SA_22G048200	6.99423	3.56733	3.48769	5.30346	5.70268	7.28269	8.72226
SaWD40-59	SA_05G167400	6.97879	9.10067	18.8747	19.0816	11.7543	13.8395	23.7538
SaWD40-325	SA_09G409500	6.90789	10.1523	5.24983	4.66468	4.42482	20.138	7.1643
SaWD40-494	SA_29G054700	6.78017	1.21709	1.75205	1.95438	14.239	7.35686	3.38971
SaWD40-80	SA_01G326600	6.73168	7.46779	5.31599	5.16408	6.15231	7.39208	8.5933
SaWD40-461	SA_06G170800	6.64243	6.12831	14.1825	10.9458	13.3021	8.86083	17.917
SaWD40-310	SA_03G180500	6.61844	12.2047	19.9925	28.4029	9.98344	27.9632	14.9022
SaWD40-124	SA_01G326200	6.50009	7.05112	4.87081	5.07163	6.19257	8.8519	9.73774
SaWD40-360	SA_08G315600	6.48025	5.58247	17.1437	15.8093	12.0843	8.36587	20.0463
SaWD40-179	SA_04G278500	6.33094	1.28477	3.71101	2.97315	6.1323	5.04809	6.81242
SaWD40-560	SA_13G071800	6.32082	4.75846	11.9206	14.2312	5.61743	8.34998	9.6832
SaWD40-232	SA_14G090700	6.30363	1.3489	1.53067	2.01914	1.86024	1.83732	2.20638
SaWD40-383	SA_08G047700	6.29245	7.65437	8.29428	10.3969	11.0542	31.1409	9.61497
SaWD40-120	SA_08G056400	6.28786	3.60159	1.56938	6.75625	8.27205	11.8384	17.5485
SaWD40-540	SA_05G016600	6.05153	3.92722	5.93979	5.57038	3.04069	2.44204	10.3527
SaWD40-57	SA_22G118700	6.0083	0	3.44715	2.7859	3.09677	8.28413	4.86459
SaWD40-447	SA_12G378300	5.99034	5.73975	4.74548	6.18429	4.62763	2.18986	6.5971
SaWD40-431	SA_18G086200	5.91301	4.70304	5.00418	5.80196	3.98749	1.1936	5.15473
SaWD40-453	SA_22G121400	5.9058	3.82366	5.52446	5.53625	6.69587	47.1906	13.76
SaWD40-133	SA_06G281500	5.89684	15.1844	9.75185	10.4131	11.7057	17.0353	9.47777
SaWD40-333	SA_24G131500	5.84548	0	0.366254	0.514848	1.53824	2.18849	0.930375
SaWD40-22	SA_13G050500	5.7253	5.13695	3.16126	2.70869	7.02576	2.93671	4.77005
SaWD40-185	SA_05G317100	5.69053	1.40831	3.92568	2.65145	3.27119	2.68618	2.91133
SaWD40-563	SA_13G037900	5.65661	9.47401	11.0649	17.4734	12.6372	66.1729	16.1252
SaWD40-181	SA_02G358500	5.64283	1.82396	1.90603	1.96441	3.39855	3.97003	3.56875
SaWD40-150	SA_12G194900	5.6331	2.87468	5.39456	6.33849	5.50166	7.54622	5.76447
SaWD40-377	SA_10G215900	5.57094	1.74054	2.98101	2.14324	2.87134	9.00167	3.21445
SaWD40-505	SA_17G092300	5.55579	5.13838	8.52156	6.17594	7.7637	16.5374	9.74476
SaWD40-339	SA_04G179800	5.53524	11.3967	22.8753	13.5879	10.8223	7.38213	13.0556
SaWD40-305	SA_07G067700	5.53038	0	0.115122	0.591414	0.70105	0.349406	0.227683
SaWD40-568	SA_07G001500	5.49766	11.7941	9.72405	15.4909	8.52153	8.18558	11.3477
SaWD40-538	SA_08G001400	5.46075	5.55157	14.2468	17.801	10.1153	2.62923	9.15648
SaWD40-71	SA_12G412400	5.4395	1.29384	7.63135	4.87642	6.2376	0.886547	10.9791
SaWD40-167	SA_07G140300	5.43849	1.03622	3.90577	6.26316	4.65489	7.93365	6.7011
SaWD40-342	SA_15G226400	5.39736	2.91998	3.734	3.76722	6.69951	5.88867	8.13712
SaWD40-236	SA_07G269300	5.39091	7.07339	3.40453	5.11497	2.9467	2.49988	3.65471
SaWD40-474	SA_03G064600	5.37611	1.09352	5.06982	5.8228	5.85073	4.01699	4.55709
SaWD40-243	SA_16G143200	5.34211	3.3931	1.26431	2.35976	3.22171	3.08758	7.18146
SaWD40-31	SA_05G134300	5.31289	3.49644	3.88044	1.95222	5.75873	5.93079	7.28898
SaWD40-82	SA_24G035500	5.29657	1.71845	2.29088	4.10373	3.16538	9.97243	5.93462
SaWD40-216	SA_15G268000	5.29262	10.8574	11.4743	9.87921	11.8126	9.61949	8.51735
SaWD40-317	SA_19G008700	5.27607	2.60852	7.37062	3.71873	0.875363	5.43209	1.19885
SaWD40-206	SA_23G030300	5.2325	2.71706	5.88293	6.00716	4.62162	25.4737	5.17936
SaWD40-295	SA_14G243900	5.15815	2.75046	8.76398	5.64994	2.9966	16.0241	6.69485
SaWD40-368	SA_13G273500	5.15746	2.88392	4.55908	2.13056	3.75521	12.6833	3.82889
SaWD40-526	SA_14G019500	5.12096	6.43086	7.05134	5.10227	4.13147	5.02023	8.09897
SaWD40-182	SA_01G319500	5.09757	0	0	0	0.671859	0	0.503207
SaWD40-56	SA_09G317300	4.98043	4.81611	4.96345	8.65183	3.79851	1.51902	5.57576
SaWD40-21	SA_18G068600	4.97971	6.58548	13.7396	10.0417	8.39029	14.6112	11.6656
SaWD40-337	SA_07G305000	4.97541	10.6109	6.06039	9.2363	9.12846	21.1745	13.1792
SaWD40-68	SA_05G269000	4.95702	31.435	34.7497	30.9097	13.0198	19.0325	33.6259
SaWD40-574	SA_14G149400	4.90984	10.6012	8.01465	3.75794	3.40158	11.2655	9.83357
SaWD40-95	SA_29G006100	4.89958	5.73028	1.95636	0.852482	1.68956	2.50608	3.11543
SaWD40-205	SA_12G134200	4.87759	6.17951	3.33837	4.41546	6.04629	6.11939	5.16841
SaWD40-427	SA_30G030700	4.85459	2.73556	2.8228	3.59699	3.08924	0.718111	2.7358
SaWD40-542	SA_13G070000	4.84265	0	0	0	1.23909	0.142068	0.787835
SaWD40-39	SA_12G194000	4.80699	1.33843	1.58788	1.33914	1.55655	3.33248	1.54841
SaWD40-129	SA_03G352100	4.78461	10.7994	9.58323	15.0051	15.119	13.8065	14.9562
SaWD40-35	SA_30G008100	4.78181	1.87305	0.252549	0.159273	2.34241	4.03542	2.22937
SaWD40-65	SA_09G429100	4.57443	6.96194	6.6213	8.47632	7.99618	12.2247	12.8591
SaWD40-70	SA_06G215600	4.4763	9.24056	17.181	10.7069	8.84935	26.5403	15.7211
SaWD40-308	SA_15G152600	4.47134	2.65498	5.27799	4.03634	6.36075	6.3744	6.00123
SaWD40-199	SA_02G005400	4.45733	6.01737	8.08553	6.60865	9.36394	11.5035	2.89766
SaWD40-162	SA_08G223300	4.44871	2.92294	0.989441	1.62374	2.81929	5.71045	3.4413
SaWD40-473	SA_19G039300	4.43332	0	3.91624	2.28379	3.1382	1.2922	3.12446
SaWD40-117	SA_10G333500	4.42441	7.57908	16.0494	30.0359	7.09114	7.16314	8.7185
SaWD40-166	SA_02G395800	4.41051	4.29608	4.58674	3.12188	3.4727	0	3.85968
SaWD40-87	SA_13G243600	4.40931	0.868718	4.82474	4.46984	2.3312	5.28443	6.28559
SaWD40-300	SA_08G118800	4.38579	6.70919	9.44767	8.72245	4.75141	13.2074	6.24205
SaWD40-231	SA_28G130600	4.3723	3.30286	0.803597	1.30681	2.06589	5.44375	2.25771
SaWD40-449	SA_06G178700	4.37057	2.04938	4.13836	3.6259	3.90743	1.49148	3.59661
SaWD40-146	SA_29G110400	4.35865	0.292167	1.36224	1.17773	3.0348	0.267142	1.23713
SaWD40-41	SA_02G141700	4.35764	3.35333	3.38739	2.10245	2.27445	6.11354	2.7656
SaWD40-18	SA_04G104900	4.35039	0	2.23742	4.31975	4.92997	0.583765	5.15674
SaWD40-104	SA_22G189600	4.25782	9.7941	14.0301	11.3347	6.83431	14.8884	18.3742
SaWD40-528	SA_07G326700	4.22126	2.95374	13.9275	10.4376	7.0612	9.35364	10.9249
SaWD40-72	SA_07G099300	4.2173	10.2991	11.8306	16.796	13.8761	21.9	24.4838
SaWD40-436	SA_10G309500	4.19687	5.41479	10.1634	9.68481	5.78161	6.46951	8.92743
SaWD40-10	SA_01G032700	4.15715	3.01311	4.1529	6.89184	4.91186	1.79095	1.83678
SaWD40-315	SA_18G121400	4.14931	0	1.49587	2.79157	1.71246	0.888517	1.62804
SaWD40-93	SA_13G218900	4.10761	8.98077	7.6167	8.35067	5.25178	9.88673	5.03082
SaWD40-369	SA_16G113600	4.08633	3.92253	11.6036	6.30981	3.15794	4.67617	6.38628
SaWD40-43	SA_03G047300	4.03575	3.144	3.90318	7.67116	12.0433	6.7691	13.4082
SaWD40-533	SA_07G062600	4.01814	5.63025	7.23858	6.17797	4.91998	3.69293	8.38545
SaWD40-111	SA_20G173500	3.96398	0.455957	2.40624	2.24531	1.57896	1.58125	2.68836
SaWD40-235	SA_08G209900	3.92474	1.14062	5.68881	4.82713	3.27044	25.0286	7.69142
SaWD40-119	SA_04G001800	3.91788	14.4957	4.50004	15.0869	10.053	7.34993	17.0096
SaWD40-439	SA_11G127200	3.89769	6.02185	1.53346	1.80327	4.92593	4.69048	9.94983
SaWD40-148	SA_31G135200	3.88744	4.37793	6.83435	4.29021	7.16136	13.6745	4.035
SaWD40-147	SA_03G012400	3.8714	8.55484	8.2047	17.7953	9.99667	1.58548	19.4727
SaWD40-48	SA_21G191700	3.86911	12.1244	16.8895	14.57	9.96054	11.7145	24.7953
SaWD40-297	SA_10G352300	3.77809	4.58425	7.59395	7.18716	6.39954	5.76107	5.20042
SaWD40-139	SA_20G105700	3.70934	2.33115	3.30835	4.4171	4.35305	9.39329	4.96525
SaWD40-3	SA_02G227400	3.67617	1.18064	1.75201	2.64134	2.5986	3.49976	3.6272
SaWD40-279	SA_16G140800	3.66982	1.23957	1.22743	0.969898	5.3758	1.65338	1.54884
SaWD40-432	SA_22G077900	3.65912	3.12399	9.4871	8.5879	4.00796	1.92108	7.72938
SaWD40-328	SA_14G032400	3.64904	8.84842	9.30513	7.10212	7.59952	50.3502	12.9471
SaWD40-144	SA_23G060500	3.64359	19.8633	10.6853	12.4069	10.6528	6.08879	15.9864
SaWD40-401	SA_11G052100	3.63277	4.48324	7.6544	7.43487	5.88737	16.4853	8.66741
SaWD40-415	SA_02G065000	3.59791	1.43451	4.21349	3.78408	2.99555	3.81436	5.50579
SaWD40-416	SA_27G083700	3.55536	0	2.24261	3.29695	3.35985	2.75634	1.51665
SaWD40-332	SA_06G088800	3.52937	8.85928	5.37957	5.41267	3.62976	4.1856	5.0847
SaWD40-160	SA_26G027900	3.52314	11.5022	7.15516	7.54662	7.36138	48.3287	6.01542
SaWD40-131	SA_02G320900	3.51447	0	0	0	1.64871	0	0.224412
SaWD40-440	SA_09G087600	3.41078	17.0318	14.4624	17.5816	13.4048	14.8155	23.7947
SaWD40-255	SA_02G342200	3.36562	1.40846	1.97137	2.05527	2.99789	5.45626	1.38105
SaWD40-420	SA_02G333100	3.35652	0.668859	0.65894	1.73627	6.12119	4.3579	7.77705
SaWD40-291	SA_17G142500	3.3547	3.51298	5.04585	3.32093	8.37017	6.48964	6.82747
SaWD40-426	SA_14G113900	3.31908	2.88599	4.80531	6.04367	4.69975	2.98699	6.25921
SaWD40-575	SA_25G033600	3.24722	1.38145	1.55212	1.7916	3.21564	2.40478	3.11672
SaWD40-174	SA_20G101700	3.24518	0	0.349671	0.26778	0.148325	0	0.140536
SaWD40-210	SA_09G320600	3.22733	3.76375	3.75855	3.70328	2.93237	3.74667	4.81732
SaWD40-203	SA_31G010800	3.22463	0.26122	0.609073	2.55478	2.32452	2.19608	1.76573
SaWD40-348	SA_19G132500	3.22325	0	0.433245	0.314541	0.534409	0.366432	0.775992
SaWD40-208	SA_08G267100	3.22321	4.18932	2.20601	2.89346	5.57916	3.13616	3.30206
SaWD40-257	SA_03G176600	3.19129	3.63188	3.9477	5.72081	6.16616	6.07197	7.69764
SaWD40-164	SA_28G061100	3.17187	1.29101	0.321466	0.512036	0.551071	0.551763	0.766201
SaWD40-541	SA_09G453200	3.16666	4.5957	21.1538	11.4511	4.74268	8.76677	6.30338
SaWD40-355	SA_08G098400	3.15821	5.04802	8.98031	9.1609	6.18447	4.09564	12.03
SaWD40-224	SA_15G256100	3.13803	5.53196	9.17483	8.62823	9.80714	22.3171	11.9553
SaWD40-99	SA_02G401800	3.13639	2.35615	18.1308	5.95431	4.40529	22.006	7.64161
SaWD40-443	SA_07G274800	3.11082	12.6394	9.25253	7.11475	7.55524	6.55617	10.0817
SaWD40-405	SA_18G013600	3.09297	4.01813	4.57509	2.80734	6.24922	4.79059	8.41071
SaWD40-225	SA_21G160700	3.05317	8.91012	4.41249	6.54525	4.59819	17.875	5.85348
SaWD40-284	SA_01G341300	2.9962	5.39763	2.48359	2.31379	3.2608	1.28814	4.84431
SaWD40-260	SA_07G114500	2.97521	4.29198	6.74251	5.67573	6.18831	3.92695	8.62687
SaWD40-67	SA_10G297800	2.95784	1.2491	29.4019	19.9246	19.0556	4.74024	12.4647
SaWD40-189	SA_05G342200	2.86793	8.57408	3.30804	3.5176	1.64446	2.03958	3.96513
SaWD40-567	SA_03G095300	2.83466	0.5209	2.14194	3.43555	2.37536	1.83367	2.13302
SaWD40-335	SA_18G022800	2.81637	15.6921	14.5527	13.5409	9.95629	51.471	19.3686
SaWD40-326	SA_30G073400	2.80802	2.21744	0.541316	0.917824	2.88975	0.789963	2.46098
SaWD40-365	SA_21G063400	2.77915	6.35747	10.3725	9.14066	8.18243	5.27224	13.3998
SaWD40-267	SA_07G043100	2.77379	5.50548	4.19606	7.6845	9.1636	3.14144	4.79555
SaWD40-520	SA_15G171100	2.73934	0.299345	0.638998	1.01218	2.46792	1.28867	1.51637
SaWD40-6	SA_08G296300	2.66568	1.58383	5.86522	3.2866	2.25407	7.20464	5.62116
SaWD40-341	SA_11G134300	2.65834	4.95512	5.14562	8.9873	7.23431	10.3258	12.1775
SaWD40-88	SA_03G037600	2.65176	2.19317	7.30767	5.13286	2.83114	31.6836	3.97111
SaWD40-390	SA_04G251800	2.62472	5.34833	13.5796	3.7149	2.85723	1.69788	1.93777
SaWD40-402	SA_16G012100	2.5692	2.74431	3.34978	2.87738	4.3896	1.5439	6.14508
SaWD40-357	SA_02G192900	2.54684	3.63197	6.27587	8.55633	4.21941	9.57531	6.45855
SaWD40-306	SA_23G080500	2.51358	0	0.052902	0.167692	1.32736	1.58078	0.676601
SaWD40-250	SA_10G054400	2.50883	7.43834	9.2126	7.86313	3.26315	12.262	5.65807
SaWD40-429	SA_03G252600	2.47951	1.8422	23.4232	10.2997	1.31475	0.529103	5.90386
SaWD40-417	SA_01G378900	2.46036	1.31929	2.92966	1.87014	1.74842	2.58707	0.419067
SaWD40-196	SA_04G184400	2.44473	5.59895	7.85083	6.97904	4.50196	16.4091	4.14688
SaWD40-115	SA_29G053700	2.4013	2.74237	0.79975	4.40373	1.95087	1.85361	0.719161
SaWD40-455	SA_16G092200	2.39396	2.15583	5.5443	6.40562	3.43991	20.9451	1.85838
SaWD40-501	SA_27G269200	2.39062	28.5967	3.61866	3.40868	4.15254	6.5526	6.52499
SaWD40-201	SA_01G310500	2.35591	7.95728	2.80979	1.97231	1.84029	3.39787	2.13549
SaWD40-555	SA_28G110400	2.33002	4.41772	1.90074	4.07432	2.37049	3.15208	2.93963
SaWD40-489	SA_12G087400	2.32288	4.33193	11.1213	4.18504	2.23373	3.80043	2.46781
SaWD40-240	SA_06G090600	2.32209	10.7589	6.03434	7.70116	9.06195	7.09947	8.36024
SaWD40-116	SA_09G472000	2.30579	0.596693	1.20191	2.75967	4.30665	0.300293	2.40324
SaWD40-229	SA_09G057200	2.29226	5.32376	10.847	6.51576	2.64671	11.789	6.71107
SaWD40-424	SA_14G072800	2.27743	0	0.014033	0	1.72494	0.337926	1.28944
SaWD40-79	SA_08G197000	2.25914	5.90539	4.26236	3.52536	2.98098	14.6956	7.05605
SaWD40-202	SA_17G023500	2.2096	11.0196	19.5382	17.1643	10.4715	40.0259	19.2834
SaWD40-44	SA_08G231900	2.18891	8.44811	4.83548	6.83582	5.09728	9.86857	10.994
SaWD40-508	SA_07G267600	2.18639	0.480623	2.29973	4.48902	4.02519	1.35062	5.28873
SaWD40-105	SA_28G123400	2.17533	6.02707	4.5229	3.47241	2.30495	1.674	4.26557
SaWD40-37	SA_10G003900	2.15849	0	1.32656	0.030461	0	0	0
SaWD40-141	SA_13G180200	2.15625	2.73872	1.5476	1.00539	3.68035	0.6207	2.57073
SaWD40-353	SA_15G270100	2.1257	7.47652	6.76449	6.03381	5.95473	2.18547	4.33183
SaWD40-262	SA_12G038700	1.98118	4.79807	3.04795	4.44608	4.68498	4.66416	5.7479
SaWD40-389	SA_13G091900	1.97812	3.01859	1.71655	1.61082	2.21482	2.27789	4.19387
SaWD40-281	SA_12G040500	1.96737	2.60377	3.15479	3.3387	2.29018	1.58213	3.17498
SaWD40-32	SA_16G166400	1.95115	14.6024	20.1019	21.5041	10.7097	37.5831	17.8087
SaWD40-547	SA_28G141200	1.95098	0	0.602915	0.809285	2.08328	0.317083	1.48021
SaWD40-428	SA_08G083800	1.92551	0	1.61827	1.71626	2.33372	2.12248	1.2151
SaWD40-354	SA_08G043500	1.91754	2.53714	4.32174	6.42127	7.81635	4.67435	4.28099
SaWD40-287	SA_02G397000	1.91736	2.60208	1.41351	1.98231	0.921079	0.413614	2.5187
SaWD40-322	SA_08G261800	1.88634	7.26543	7.66893	4.49787	7.05285	6.69193	10.5886
SaWD40-554	SA_16G071100	1.78362	2.01361	8.0416	20.7099	18.236	5.39977	13.9178
SaWD40-331	SA_14G260300	1.74955	0	2.14025	3.11572	9.11448	2.47489	3.90056
SaWD40-230	SA_06G214500	1.72488	4.08064	6.33265	8.18662	3.30868	2.07662	8.14348
SaWD40-145	SA_13G111000	1.69162	4.3029	4.58762	6.26357	5.23849	4.84693	7.31617
SaWD40-486	SA_27G205100	1.6539	4.39994	2.32808	1.03153	1.22498	2.70307	2.03777
SaWD40-460	SA_05G186500	1.62947	1.85953	4.70735	4.90587	2.4963	1.74089	6.17376
SaWD40-192	SA_07G075400	1.59405	8.39689	1.98622	3.34768	3.82295	0.603409	5.30146
SaWD40-290	SA_23G002500	1.57749	0.815744	2.84652	1.80878	1.64443	15.1976	3.34334
SaWD40-307	SA_06G156600	1.55686	0.591676	4.29983	7.00643	8.63386	6.68143	8.76293
SaWD40-450	SA_08G048100	1.54154	2.91161	2.88044	3.18722	2.5781	0.971403	4.0858
SaWD40-388	SA_11G017000	1.54029	2.78955	11.2983	10.6499	5.10373	6.16171	9.17621
SaWD40-134	SA_28G182400	1.51622	20.2037	1.54637	1.18308	2.43619	4.99286	3.67483
SaWD40-138	SA_14G074500	1.50892	6.988	7.45122	12.1765	4.66189	20.2354	9.07768
SaWD40-96	SA_01G002600	1.48693	0.451605	1.12237	0.364637	3.51836	3.06449	2.42166
SaWD40-386	SA_24G193300	1.46939	7.96457	7.52359	7.62866	7.54784	2.45825	11.1454
SaWD40-531	SA_16G094200	1.41522	5.5029	8.15454	7.39012	8.36257	7.83768	10.6546
SaWD40-24	SA_20G011700	1.37519	2.60356	8.11065	5.30434	2.04649	7.6437	5.38744
SaWD40-371	SA_04G034300	1.33463	5.29202	11.061	18.7866	13.6895	8.30824	11.2313
SaWD40-421	SA_11G301900	1.31152	1.42532	6.16406	3.74991	2.68954	0.680003	6.56198
SaWD40-544	SA_31G154900	1.23483	3.44087	9.30217	9.09508	3.89495	5.99862	10.1659
SaWD40-372	SA_30G056800	1.18297	1.80735	2.81512	2.81232	4.56319	7.52741	4.55421
SaWD40-47	SA_29G114000	1.15122	0.928732	1.6031	1.0842	0.434115	0.515596	1.89127
SaWD40-9	SA_06G019000	1.04943	5.18155	4.38679	7.19513	5.29164	2.35088	9.36679
SaWD40-441	SA_21G074100	1.03584	3.25853	4.41089	4.94241	2.65515	2.94939	3.81613
SaWD40-1	SA_12G194800	1.01829	1.0603	2.49692	2.80295	2.07763	10.8964	4.06193
SaWD40-78	SA_17G067800	0.987363	1.43742	3.11388	3.43502	1.53635	0.951928	1.23129
SaWD40-364	SA_03G027200	0.901006	0.026951	1.07166	0.553047	0.129805	0.084478	0.428936
SaWD40-482	SA_06G291600	0	0	0.403542	0.327619	0.843659	0.395495	0.27037
SaWD40-340	SA_14G257600	0.865636	0.548804	3.52378	1.78018	1.18021	0.498753	1.42876
SaWD40-465	SA_07G047500	0.822328	2.112	2.50249	1.29178	2.19592	1.14201	4.03704
SaWD40-293	SA_18G102500	0	0	0.25348	0.308555	0.399214	2.9945	0
SaWD40-159	SA_12G060600	0.719409	14.2203	12.1081	13.6534	14.5591	27.4386	17.166
SaWD40-359	SA_05G233100	0.717058	1.10922	2.39386	4.57911	2.09545	0.901097	3.87786
SaWD40-351	SA_03G282800	0.61842	3.03229	1.30992	3.42538	1.12621	0.578934	1.65846
SaWD40-498	SA_10G280800	0.596739	0.423079	0.752177	1.44853	0.644386	0.138769	1.99489
SaWD40-132	SA_12G032500	0.519781	0.670948	2.42853	2.86468	0.227816	0.376657	2.40901
SaWD40-263	SA_30G008300	0.514855	4.6178	3.63447	2.86145	2.01134	5.94703	3.4019
SaWD40-286	SA_06G134200	0.488583	0	0.63666	1.08049	2.24757	1.81764	1.83756
SaWD40-277	SA_17G009400	0.484642	1.03886	1.48433	2.75525	1.87679	5.14194	2.84777
SaWD40-214	SA_02G008700	0.430413	12.9393	1.81182	2.05816	4.11483	1.74182	4.33812
SaWD40-83	SA_11G128900	0	0	0.482357	0.290472	0.342317	0.135847	10.6641
SaWD40-171	SA_12G099300	0.290784	4.60874	18.472	12.9049	4.83321	3.5096	12.1211
SaWD40-237	SA_07G239200	0.280369	0.893287	10.3245	2.78669	2.16847	2.37293	5.00906
SaWD40-350	SA_09G469400	0.243341	6.09561	4.0161	4.34355	4.30865	12.1736	8.0101
SaWD40-395	SA_28G155600	0.198442	6.44069	5.03129	9.50408	2.34923	0.744097	6.482
SaWD40-97	SA_08G170800	0.148393	3.99138	2.10322	3.23071	3.63008	6.3828	5.36072
SaWD40-312	SA_06G187500	0.132801	0.298601	0.86085	1.21869	0.89893	0.898933	1.48272
SaWD40-66	SA_10G245100	0	0	0	0.277889	0.16743	0	0.504223
SaWD40-107	SA_17G124800	0	0	0.666417	0.264375	1.64577	0.35028	0.666974
SaWD40-12	SA_30G130200	0	0	0.137794	0.223772	0.186215	0	0.544831
SaWD40-73	SA_17G096500	0	0	0.080843	0.182775	0.362007	1.71265	0
SaWD40-142	SA_27G130100	0	0	0.112715	0.176261	1.76819	1.8011	1.15705
SaWD40-425	SA_27G269500	0	0.593873	0.530032	0.172549	2.5033	2.099	14.9464
SaWD40-272	SA_17G066800	0.898034	0	0	0.156408	2.25327	0.120018	0.81147
SaWD40-34	SA_05G208500	0	0	0.125049	0.149734	1.16549	0.238206	6.46278
SaWD40-470	SA_13G000300	0	0	0.857076	0.123509	0.312627	0	0.152906
SaWD40-125	SA_10G153100	0	0	0	0.122717	1.14911	0	0
SaWD40-161	SA_12G070600	0	0	0.072684	0.118737	0.362723	0	0.337624
SaWD40-347	SA_12G336700	0	0	0.033888	0.113686	0.379076	0.808507	0.065104
SaWD40-276	SA_05G314800	0	0	0.044528	0.106182	0.185413	0	0.247236
SaWD40-381	SA_18G057000	0.813749	0	0.081221	0.103968	1.47415	0	1.05836
SaWD40-454	SA_21G060100	0	0	0.359991	0.098542	0.076228	0.17781	0.11183
SaWD40-477	SA_03G201300	0	0	0	0.070708	0.213372	1.30958	0
SaWD40-258	SA_02G389700	0	0.866501	0.192832	0.068578	0.371485	1.17999	0.665183
SaWD40-407	SA_06G238800	0	0	0.01022	0.054491	0.190393	0	10.5917
SaWD40-69	SA_23G131200	0	0	0	0.051145	3.97229	8.49117	3.5755
SaWD40-94	SA_13G131600	0	0	0	0.03958	0.482775	0	0.659914
SaWD40-378	SA_25G155000	0	0	2.92459	1.88928	0.825275	2.00788	0.411936
SaWD40-456	SA_04G070200	0	0	0.398478	0.034976	0.150107	0	0
SaWD40-54	SA_02G045300	0	1.80234	6.30341	5.54743	5.36483	7.86817	5.5516
SaWD40-103	SA_01G296700	0	0	0.056758	0.028057	0	0	0
SaWD40-324	SA_22G160800	0	1.49233	1.13417	1.62087	1.89411	2.36717	4.33825
SaWD40-311	SA_05G088000	0	1.00791	5.9399	3.60818	3.81338	1.12976	1.48005
SaWD40-582	SA_08G076000	0	6.24125	3.57825	4.1018	2.62592	1.80721	4.87647
SaWD40-239	SA_31G017500	0	13.5222	19.1445	24.9481	18.1792	38.4764	24.8106
SaWD40-247	SA_01G040200	0	0.814965	1.04825	1.52056	1.47665	2.23684	0.722252
SaWD40-289	SA_10G067800	0	2.59737	3.34281	3.86523	3.59413	0.528902	4.277
SaWD40-265	SA_01G060800	0	2.08282	4.72814	3.73312	2.92054	4.55316	8.26626
SaWD40-121	SA_21G109800	0	0	0.612534	3.64715	2.97894	0.22942	0.610988
SaWD40-149	SA_27G251800	0	1.25727	3.55771	4.89512	2.90243	4.53378	5.48032
SaWD40-188	SA_28G028700	0	1.16284	1.01764	1.71623	1.60205	0.147262	1.69022
SaWD40-209	SA_22G113200	0	0	0.18195	2.46917	0.529483	0.223303	0.027955
SaWD40-217	SA_28G182700	0	4.14349	0.770074	0.461109	0.784652	2.09005	2.18677
SaWD40-33	SA_07G203700	0	1.50866	2.19515	1.67881	1.83371	3.77296	1.96741
SaWD40-109	SA_27G189900	0	1.36966	0.929385	4.77578	2.41497	1.44782	2.90623
SaWD40-433	SA_29G067600	0	4.28308	2.99993	3.28846	3.72209	0.321864	0.807367
SaWD40-468	SA_07G249800	0	0	0.032352	0.009803	0	0	0.045425
SaWD40-186	SA_30G055400	0	3.90793	0.510012	0.644568	0.701168	2.83438	0.15827
SaWD40-499	SA_11G167500	0	2.17104	4.57626	6.62337	2.13	17.2384	6.6714
SaWD40-488	SA_29G092600	0	0.332379	0.071874	0.00763	1.29953	0.09338	0.108442
SaWD40-444	SA_01G141000	0.012302	0.054214	0.005763	0.000902	0.010006	1.11794	0.03967
SaWD40-475	SA_03G055200	0	0.521098	0.841619	2.28085	5.15674	0.429511	0.604137
SaWD40-52	SA_09G365200	0	2.72052	1.67676	2.87508	6.44302	12.9637	6.17722
SaWD40-419	SA_12G021600	0	17.6749	8.43646	3.0019	6.40594	5.01324	5.91538
SaWD40-321	SA_27G075800	0	0	2.34878	1.28015	1.99203	0.166679	2.50352
SaWD40-580	SA_02G340200	0	0	0	0	0.035572	0	0
SaWD40-367	SA_27G211600	0	10.9929	3.63025	1.23655	5.69835	1.57876	1.28061
SaWD40-259	SA_01G003500	0	2.95767	4.85522	4.38675	1.67269	1.7333	1.56272
SaWD40-75	SA_01G396600	0	13.7847	11.5668	15.6044	6.13686	4.68056	9.25997
SaWD40-29	SA_07G097300	0	0	0	0	0	0	0.076594
SaWD40-172	SA_05G050800	0	2.35417	1.8035	1.5454	2.64327	2.0184	2.72218
SaWD40-435	SA_05G178900	0	4.77875	4.95756	5.25965	4.95439	3.50792	6.58451
SaWD40-459	SA_08G286800	0	3.81812	2.80678	11.2625	3.03895	2.20826	3.38875
SaWD40-220	SA_14G060700	0	0	0	0	0	0	0.050058
SaWD40-374	SA_22G064400	0	0	0	0	0.078066	0	0
SaWD40-376	SA_16G153600	0	0	0	0	0	0	13.9709
SaWD40-85	SA_16G183500	0	0	0	0	0	0	0.262354
SaWD40-28	SA_19G101900	0	3.58619	9.80349	12.1226	5.65278	0	6.38519
SaWD40-462	SA_20G085200	0	9.27554	13.9214	11.855	5.82396	0.209774	0.164694
SaWD40-242	SA_07G102900	0	4.48394	9.40696	7.49723	6.95077	4.52123	12.6681
SaWD40-423	SA_11G167700	0	4.27198	9.14765	11.3376	8.00393	16.4097	11.7319
SaWD40-379	SA_04G152000	0	0	0	0	0.170366	0	0
SaWD40-502	SA_18G173700	0	0	0	0	0.309609	0	0
SaWD40-392	SA_15G069400	0	0	0	0	0.027888	0	0
SaWD40-442	SA_22G067000	0	0.955999	3.64665	2.87184	2.61456	3.27054	3.52379
SaWD40-81	SA_09G137400	0	8.00618	8.26962	11.7686	7.81056	9.32499	14.1418
SaWD40-515	SA_01G342300	0	3.09034	7.9212	4.331	3.295	4.72747	5.90011
SaWD40-193	SA_16G024400	0	0	0	0	0	0	1.13469
SaWD40-517	SA_02G396000	0	2.8093	2.94766	2.88881	4.07033	7.17592	5.52609
SaWD40-74	SA_23G122700	0	0	0	0	0	0	0.02197
SaWD40-500	SA_16G024300	0	0	0	0	0	0	1.53583
SaWD40-130	SA_28G089200	0	1.156	0	0	0	0	0.248426
SaWD40-391	SA_04G203900	0	0	0	0	1.45263	0	0
SaWD40-268	SA_11G271600	0	5.91652	2.24491	2.07539	4.14745	1.26467	4.58232
SaWD40-346	SA_04G151800	0	0	0	0	0.5089	0	0
SaWD40-50	SA_19G242200	0	6.50824	24.6876	17.0089	8.28837	7.1981	12.9125
SaWD40-184	SA_27G164800	0	5.22471	0.057694	0	1.31444	0	0
SaWD40-319	SA_02G036700	0	0	1.84485	2.27611	1.1175	3.39266	2.18175
SaWD40-294	SA_27G229600	0	4.95171	4.43391	5.24371	4.0376	2.89125	6.55945
SaWD40-222	SA_05G155600	0	0	1.4654	5.37289	5.89398	2.66039	9.43744
SaWD40-316	SA_18G098200	0	9.94034	12.9357	10.8155	16.4843	19.9239	13.5157
SaWD40-356	SA_06G001200	0	2.55854	0.572156	0.310308	2.60568	0.633572	4.22165
SaWD40-211	SA_01G006100	0	4.47856	1.02599	2.23207	3.86155	2.59848	1.42328
SaWD40-527	SA_05G011400	0.072907	0	0	0	0.660345	0	0.17537
SaWD40-282	SA_12G141300	0	0.303419	4.48394	3.7112	2.47497	1.55312	4.08544
SaWD40-491	SA_06G287200	0	3.25987	7.73112	6.14618	3.36107	3.27628	3.82486
SaWD40-519	SA_05G291000	0	1.14587	1.50686	2.49963	3.20901	3.02218	10.7524
SaWD40-393	SA_07G217900	0	0	0	0	0	0	0
SaWD40-314	SA_11G028600	0	1.79704	13.0704	5.32152	1.92275	4.06065	3.96796
SaWD40-16	SA_31G131400	0	0	0	0	0	0	0
SaWD40-399	SA_30G184900	0	1.46975	1.1442	2.09389	2.38292	1.42117	1.48564
SaWD40-197	SA_09G418000	0	0.324066	1.29501	0.562644	3.59443	0.339723	0.335371
SaWD40-175	SA_06G345400	0	0.153257	2.08002	2.5122	3.05727	0	1.95253
SaWD40-410	SA_01G339000	0	0	0	0	0	0	0
SaWD40-62	SA_08G123500	0	0	0	0	0	0	0
SaWD40-581	SA_14G125900	0	0	0	0	0	0	0
SaWD40-578	SA_13G276100	0	2.60426	4.73228	4.06515	3.84194	1.40017	3.63276
SaWD40-414	SA_10G097000	0	4.50507	6.78326	11.2431	8.29497	4.69832	15.0964
SaWD40-84	SA_14G144500	0	0	0	0	0	0	0
SaWD40-245	SA_15G016300	0	3.63555	3.06581	3.96083	2.85346	4.41398	6.96215
SaWD40-349	SA_11G190000	0	1.4244	1.53248	3.08007	3.19978	0.486049	2.88727
SaWD40-218	SA_03G232300	0	0	0	0	0	0	0
SaWD40-524	SA_01G396100	0	0.422409	5.41969	4.95414	6.76265	8.02113	5.44334
SaWD40-472	SA_13G122600	0	0	0.352739	1.28693	0.65636	0.962665	0.535711
SaWD40-529	SA_14G277700	0	4.35644	4.10895	4.42561	3.57284	8.72293	2.73266
SaWD40-370	SA_01G342500	0	0.734576	4.18708	8.91604	6.83329	0.888676	3.9009
SaWD40-493	SA_14G183500	0	0	0	0	0	0	0
SaWD40-400	SA_24G190400	0	0	0	0	0	0	0
SaWD40-278	SA_29G029300	0	1.22305	2.43195	2.42252	3.22332	0.524819	2.82301
SaWD40-412	SA_15G029900	0	0	0	0	0	0	0
SaWD40-490	SA_07G213500	0	1.95833	0.415307	0.236997	1.0072	0.275154	0.606662
SaWD40-481	SA_11G229600	0	1.19459	0.927423	1.01799	2.55924	1.02147	2.34747
SaWD40-396	SA_07G217100	0	0	0	0	0	0	0
SaWD40-123	SA_04G078300	0	1.93544	2.55763	2.18757	3.86679	5.0676	2.76837
SaWD40-90	SA_10G207100	0	0.902838	5.91229	4.39655	3.88425	0.674409	2.74653
SaWD40-406	SA_10G248200	0	3.04621	4.11078	8.35877	14.1308	1.03949	11.1034
SaWD40-448	SA_07G047200	0	0.939195	4.50774	4.32696	8.44556	3.58068	6.13025
SaWD40-398	SA_09G005400	0	1.01149	2.97614	0.755065	0.058396	0	0
SaWD40-334	SA_13G086200	0	6.41844	8.20364	10.6623	4.58057	10.1332	8.96462
SaWD40-108	SA_03G027300	0	0	0	0	0	0	0
SaWD40-562	SA_01G237600	0	0.28976	6.5938	3.70666	1.57644	2.49227	1.58416
SaWD40-404	SA_24G173400	0	0	0	0	0	0	0
SaWD40-375	SA_15G029800	0	0	0	0	0	0	0
SaWD40-507	SA_04G323900	0	1.03892	1.27889	3.39923	3.26356	0.76942	3.1473
SaWD40-269	SA_13G051400	0	0	0	0	0	0	0
SaWD40-100	SA_13G051300	0	0	0	0	0	0	0
SaWD40-430	SA_10G185600	0	0	0	0	0	0	0
SaWD40-411	SA_01G332300	0	0.278985	0.072135	0	4.58941	0	13.1604
SaWD40-469	SA_02G236600	0	2.14981	8.88409	1.33153	0.031497	3.54641	1.34594
SaWD40-13	SA_05G005700	0	0	0.870093	3.4981	6.83666	2.25154	3.35431
SaWD40-30	SA_11G043700	0	0.511578	0	0	0.327767	0	0.022341
SaWD40-496	SA_09G365000	0	0	0.653466	1.15435	1.76376	8.91813	1.98097
SaWD40-76	SA_16G177000	0	27.3769	7.55164	3.03135	2.702	0.686506	1.84241
SaWD40-280	SA_21G044400	0	6.40572	2.61699	4.6058	4.50858	1.71186	3.81498
SaWD40-256	SA_13G011700	0	0	0	0	0.346	2.28975	0
SaWD40-523	SA_09G411400	0	4.70456	12.2316	8.21114	5.55186	8.32947	10.8651
SaWD40-296	SA_18G128800	0	0.668544	1.30527	1.44968	2.0274	5.2668	2.34774
SaWD40-36	SA_25G209300	0	4.53748	11.3607	9.89013	2.97837	18.8479	36.2012
SaWD40-516	SA_26G003600	0	1.95757	3.50506	3.06831	3.59087	3.76206	4.04217
SaWD40-251	SA_01G167800	0	0	0.458258	1.67112	2.61213	0.133172	9.33057
SaWD40-318	SA_08G316000	0	0	0	0	0.383636	0	1.35978
SaWD40-514	SA_17G169100	0	0	0	0	1.46062	0	0.306074
SaWD40-301	SA_13G170000	0	3.74097	3.31064	7.46379	12.5432	3.60118	11.0192
SaWD40-200	SA_13G146500	0	0.028004	0.045784	0	0	0.529949	0.394183
SaWD40-504	SA_12G253000	0	0	0.146805	0	0	0.224017	0
SaWD40-484	SA_22G022900	0	1.37274	2.80517	2.65472	2.06145	8.3656	1.37149
SaWD40-102	SA_12G116900	0	0	0	0	1.99554	0	0.163542
SaWD40-92	SA_21G181000	0	5.22226	4.88719	4.90123	4.42865	14.6613	4.32827
SaWD40-112	SA_15G239800	0	0	0	0	0	0.481227	9.04384
SaWD40-19	SA_01G370000	0	0	0.287343	0	1.0322	0	0.040304
SaWD40-274	SA_23G107000	0	0.953374	1.47324	3.34495	1.72607	1.89259	3.50239
SaWD40-20	SA_22G180200	0	0.425346	1.05949	0.468224	2.41783	6.37466	0.829978
SaWD40-561	SA_10G248100	0	0	5.53001	7.32016	13.7941	0	9.92134
SaWD40-397	SA_15G182400	0	3.30864	1.36007	0.411604	0.699353	0	0.886578
SaWD40-152	SA_02G174100	0	0	0	0	0.028542	0	0.098778
SaWD40-409	SA_04G290500	0	19.43	11.0177	14.4764	16.4285	22.0768	18.4175
SaWD40-327	SA_09G428400	0	13.0382	83.1386	23.2059	9.90751	2.40307	7.94194
SaWD40-336	SA_01G174900	0	0.518788	7.03615	0.200275	0.20087	0.352044	0.830963
SaWD40-246	SA_24G006800	0	10.5053	6.79283	5.62521	9.29108	6.91653	11.1713
SaWD40-127	SA_10G289300	0	1.75537	1.49312	1.37191	1.60013	1.40643	3.06652
SaWD40-170	SA_24G194000	0	0	0.007844	0	0	0	1.16583
SaWD40-323	SA_11G071700	0	1.37136	0.86661	1.27373	1.14711	0.256041	1.08781
SaWD40-168	SA_01G396000	0	0.997436	2.7296	3.71301	2.0704	6.19157	3.93156
SaWD40-64	SA_07G047100	0	0	2.80897	5.63968	2.6768	2.16249	3.1022
SaWD40-513	SA_23G073400	0	0.546642	2.76316	3.72325	4.86264	0.367308	4.23811
SaWD40-330	SA_09G345300	0	5.20223	6.47846	11.4615	7.2449	12.8235	12.9484
SaWD40-98	SA_10G219800	0	1.91762	3.25689	2.88531	2.56616	3.36656	1.74122
SaWD40-485	SA_12G242100	0	0	0	0	0	0.229974	0.964922
SaWD40-244	SA_29G105000	0	0.385002	1.76815	0.899421	0.16204	0.035715	0.579205
SaWD40-408	SA_01G296800	0	0	0.179283	0	0	0	0.050228
SaWD40-187	SA_09G217200	0	0.725773	0.628887	1.00628	0.313361	0	0.940974
SaWD40-151	SA_12G097000	0	0	1.81866	3.96028	1.65759	0.908102	3.58494
SaWD40-219	SA_07G041100	0	0	0	0	3.79992	0.934587	0
SaWD40-558	SA_12G189300	0	1.01583	2.63239	1.69211	1.82072	1.49751	3.33189
SaWD40-571	SA_13G056800	0	0	3.15293	4.74845	2.97655	0	3.58466
SaWD40-510	SA_08G121400	0	1.69646	2.41847	2.71579	3.85084	0.85941	2.82343
